# Supplementary material for: Biphasic regulation of osteoblast development via the ERK MAPK–mTOR pathway
Source: eLife journal article supplement (doi:10.7554/elife.78069), 2022-08-17
Supplement: supp [file elife-78069-supp-v1.zip]

Archive with 26 entries (26 files):
- elife_poa_e78069_Transparent_Reporting_File.docx
- elife_poa_e78069_Figure_1_figure_supplement_1.jpg
- elife_poa_e78069_Figure_2_figure_supplement_1.jpg
- elife_poa_e78069_Figure_3_figure_supplement_1.jpg
- elife_poa_e78069_Figure_3_figure_supplement_2.jpg
- elife_poa_e78069_Figure_3_figure_supplement_3.jpg
- elife_poa_e78069_Figure_3_figure_supplement_4.jpg
- elife_poa_e78069_Figure_3_figure_supplement_5.jpg
- elife_poa_e78069_Figure_4_figure_supplement_1.jpg
- elife_poa_e78069_Figure_5_figure_supplement_1.jpg
- elife_poa_e78069_Figure_1_source_data_1.xlsx
- elife_poa_e78069_Figure_1_figure_supplement_1_source_data_1.xlsx
- elife_poa_e78069_Figure_2_source_data_1.xlsx
- elife_poa_e78069_Figure_2_figure_supplement_1_source_data_1.xlsx
- elife_poa_e78069_Figure_3_source_data_1.xlsx
- elife_poa_e78069_Figure_3_figure_supplement_1_source_data_1.xlsx
- elife_poa_e78069_Figure_3_figure_supplement_4_source_data_1.xlsx
- elife_poa_e78069_Figure_3_figure_supplement_4_source_data_2.pdf
- elife_poa_e78069_Figure_3_figure_supplement_5_source_data_1.pdf
- elife_poa_e78069_Figure_3_figure_supplement_5_source_data_2.xlsx
- elife_poa_e78069_Figure_4_source_data_1.xlsx
- elife_poa_e78069_Figure_4_figure_supplement_1_source_data_1.xlsx
- elife_poa_e78069_Figure_5_source_data_1.xlsx
- elife_poa_e78069_Figure_5_figure_supplement_1_source_data_1.pdf
- elife_poa_e78069_Figure_6_source_data_1.pdf
- elife_poa_e78069_Figure_6_source_data_2.xlsx
