# Supplementary material for: Biphasic regulation of osteoblast development via the ERK MAPK–mTOR pathway
Source: eLife journal article supplement (doi:10.7554/elife.78069), 2022-08-17
Supplement: supp [file elife-78069-supp-v1.zip › elife_poa_e78069_Figure_1_figure_supplement_1_source_data_1.xlsx]

## Sheet: File info
	Figure 1-figure supplement 1-source data 1
	Source data for Figure 1-figure supplement 1

## Sheet: Figure 1-figure supplement 1
	Figure 1-figure supplement 1-source data 1
	Figure 1-figure supplement 1. Osteogenic gene expression in human BMSCs.
	RUNX2 mRNA			SP7 mRNA
	0 d	8 d		0 d	8 d
	0.964246	4.10526		0.741707	1.84371
	1.07734	4.30936		0.626629	1.8916
	0.924967	4.19152		1.42658	2.45785
	1.03345	4.39991		1.20524	2.52169
