# Supplementary material for: Biphasic regulation of osteoblast development via the ERK MAPK–mTOR pathway
Source: eLife journal article supplement (doi:10.7554/elife.78069), 2022-08-17
Supplement: supp [file elife-78069-supp-v1.zip › elife_poa_e78069_Figure_1_source_data_1.xlsx]

## Sheet: File info
	Figure 1-source data 1
	Source data for Figure 1A-I

## Sheet: Figure 1A
	Figure 1-Source data 1
	Figure 1A. Quantification of femoral bone mass in vehicle or trametinib-treated mice.
	Tb. BV/TV
		Vehicle								Tramatinib
	Sham	0.0375	0.0367	0.047	0.0408	0.0405	0.0632	0.0456	0.06	0.0326	0.0406	0.0429	0.0459	0.0493	0.0615	0.0549
	OVX	0.0193	0.025	0.0253	0.0213	0.0279	0.0236	0.0278	0.0283	0.0319	0.0383	0.0339	0.0332	0.0367	0.0369	0.0336
	Tb. Th
		Vehicle								Tramatinib
	Sham	0.0354	0.0338	0.0358	0.0315	0.0349	0.0364	0.0354	0.0374	0.0285	0.0376	0.0392	0.0372	0.0382	0.0399	0.0358	0.0334
	OVX	0.0296	0.0336	0.0309	0.0355	0.0356	0.0314	0.0299	0.0319	0.0399	0.0373	0.0332	0.0359	0.0338	0.0369	0.0371

## Sheet: Figure 1B
	Figure 1-source data 1
	Figure 1B. Quantification of bone formation rate/bone surface in vehicle or trametinib-treated mice.
	BFR/BS
	Vehicle	Tramatinib
	479.697	499.385
	454.696	486.547
	486.13	712.892
	410.898	525.413
	477.503	512.436
	415.966	510.091

## Sheet: Figure 1C
	Figure 1-source data 1
	Figure 1C. Quantification of osteoblast surface/bone surface in vehicle or trametinib-treated mice.
	Ob.S/BS
	Vehicle	Trametinib
	36.7741	42.962
	33.1345	45.515
	35.8581	47.5369
	36.4718	40.5596

## Sheet: Figure 1D
	Figure 1-source data 1
	Figure 1D. Trametinib treatment at day 0 of osteogenic culture-quantification of alizarin red and cell proliferation.
	Alizarin red					Cell proliferation
	Trametinib (uM)					Trametinib (uM)
	0	0.1	0.5	1		0	0.1	0.5	1
	0.721708	0.734143	0.113479	0.131934		1.12071	0.764689	0.588088	0.518388
	1.56815	0.163085	0.079186	0.153399		0.977764	0.6835	0.526838	0.394559
	0.650245	0.346064	0.117667	0.086516		0.99865	0.61389	0.482771	0.403791
	0.707442	0.444884	0.146593	0.195414		0.985427	0.706086	0.563168	0.464159
	1.35245	0.596189	0.037957	0.180885		1.00428	0.686552	0.607312	0.471346
						0.913173	0.707797	0.614387	0.486879

## Sheet: Figure 1E
	Figure 1-source data 1
	Figure 1E. Trametinib treatment at day 8 of osteogenic culture- quantification of alizarin red and cell proliferation.
	Alizarin red					Cell proliferation
	Trametinib (uM)					Trametinib (uM)
	0	0.01	0.1	0.5		0	0.01	0.1	0.5
	1.8858	2.85443	2.94335	6.04156		0.988529	0.955588	1.08557	0.907876
	0.387651	0.276251	1.72595	2.64512		1.10951	1.1215	1.01398	1.04838
	0.59996	0.559996	0.760815	2.72705		1.02661	0.924095	0.814306	0.946563
	0.466081	0.445099	0.95564	3.04376		0.918518	0.917592	0.975581	0.962348
	0.504546	1.45369	1.81537	2.19802		1.00427	0.954588	1.08714	0.984165
	2.15606	3.31602	2.86592	3.92896		0.952566	0.952287	1.06569	0.855804

## Sheet: Figure 1F
	Figure 1-source data 1
	Figure 1F. ALP activity in trametinib-treated osteoblasts.
	Trametinib (uM)
	0	0.01	0.05	0.1	0.5	1
	1.09091	1.81818	3.72727	3.90909	20	18.0909
	0.909091	2.27273	3.18182	4.45455	19.7273	16.9091
	0.818182	1.36364	3.81818	4.63636	20.6364	16.5454
	1.09091	2.09091	2.27273	4.54545	16.6364	19.3636
	0.818182	2.36364	4.45455	5	22.2727	23.3636
	1.27273	2.09091	3.18182	4	22.8182	16.9091

## Sheet: Figure 1G
	Figure 1-source data 1
	Figure 1G. Osteogenic gene expression in trametinib-treated osteoblasts.
	Ibsp mRNA			Bglap mRNA
	Vehicle	Trametinib		Vehicle	Trametinib
	0.598214	406.054		0.777778	8.75
	0.526786	406.268		0.666667	8.77778
	1.51786	442.125		1.36111	7.25
	1.33929	442.348		1.19444	7.25

## Sheet: Figure 1H
	Figure 1-source data 1
	Figure 1H. Quantification of alizarin red in trametinib-treated osteoblasts.
	Trametinib (uM)
	0	0.01	0.05	0.1	0.5	1
	1.2232	0.973638	0.71529	0.866432	2.88401	3.63445
	0.98594	1.17223	0.411248	0.804921	2.84183	2.91916
	0.72232	1.04745	0.664323	0.702988	3.49385	2.67311
	1.13884	1.16872	0.404218	1.47276	3.41476	2.942
	0.97891	1.23726	0.919156	0.646749	3.35325	2.99121
	0.950791	1.10896	0.778559	0.630931	3.17926	3.32337

## Sheet: Figure 1I
	Figure 1-source data 1
	Figure 1I. Quantification of cell proliferation in trametinib-treated osteoblasts.
	Trametinib (uM)
	0	0.01	0.05	0.1	0.5	1
	0.953797	0.870737	0.902687	0.954144	0.811653	0.871404
	0.936005	0.786485	0.945407	0.852322	0.793924	0.894152
	0.944739	0.875243	0.808175	0.802098	0.819638	0.839792
	1.11498	0.85482	1.55555	0.879137	0.887202	0.85078
	1.03294	0.834234	0.853408	0.833107	0.849749	0.843301
	1.01754	0.899437	0.899188	0.892303	0.813278	0.893533
