# Supplementary material for: Biphasic regulation of osteoblast development via the ERK MAPK–mTOR pathway
Source: eLife journal article supplement (doi:10.7554/elife.78069), 2022-08-17
Supplement: supp [file elife-78069-supp-v1.zip › elife_poa_e78069_Figure_2_figure_supplement_1_source_data_1.xlsx]

## Sheet: File info
	Figure 2-figure supplement 1-source data 1
	Source data for Figure 2-figure supplement 1A-C

## Sheet: Figure 2-figure supplement 1A
	Figure 2-figure supplement 1-source data 1
	Figure 2-figure supplement 1A. Quantification of TRAP-stained osteoclasts in WT and dKODmp1 mice.
	N. Oc/B. Pm			ES/BS
	WT	dKODmp1		WT	dKODmp1
	1.7452	3.2444		14.7048	20.4662
	3.9019	4.5522		17.6214	21.2221
	1.732	4.953		15.3376	22.876
	3.4939	3.5982		18.6637	23.7554
	3.2703	3.8964
	2.7452	4.2444

## Sheet: Figure2-figure supplement 1B
	Figure 2-figure supplement 1-source data 1
	Figure 2-figure supplement 1B. Serum levels of Ctx-I in WT and dKODmp1 mice.
	WT	dKODmp1
	14.9369	42.2631
	13.6001	43.7202
	17.0483	50.4696
	33.9567	49.0056
	36.2693	42.1152
	45.9958	53.5556
	33.9731	38.7281

## Sheet: Figure 2-figure supplement 1C
	Figure 2-figure supplement 1-source data 1
	Figure 2-figure supplement 1C. mRNA levels of Dmp1, Phex, and Sost in WT and dKODmp1 tibial bones.
	Dmp1 mRNA			Phex mRNA			Sost mRNA
	WT	dKODmp1		WT	dKODmp1		WT	dKODmp1
	1.03898	0.997553		0.909387	0.869619		1.01418	0.27375
	0.949209	1.04974		1.08755	0.956261		0.926554	0.288071
	1.05132	0.930872		0.912189	1.21532		1.07611	0.299845
	0.960488	0.97957		1.0909	1.33641		0.983137	0.315532
	Tnfsf11 mRNA			Tnfrsf11b mRNA
	WT	dKODmp1		WT	dKODmp1
	0.940594	0.636779		1.06564	0.417202
	0.859339	0.670098		0.973574	0.439026
	1.14973	1.14745		1.02466	0.478464
	1.0504	1.20748		0.936125	0.503494
