# Supplementary material for: Biphasic regulation of osteoblast development via the ERK MAPK–mTOR pathway
Source: eLife journal article supplement (doi:10.7554/elife.78069), 2022-08-17
Supplement: supp [file elife-78069-supp-v1.zip › elife_poa_e78069_Figure_2_source_data_1.xlsx]

## Sheet: File info
	Figure 2-source data 1
	Source data for Figure 2A, C-G, I and K

## Sheet: Figure 2A
	Figure 2-source data 1
	Figure 2A. Mek1 and Mek2 mRNA levels in the tibial bones of WT and dKODmp1 mice.
	Mek1 mRNA			Mek2 mRNA
	WT	dKODmp1		WT	dKODmp1
	0.994455	0.389829		1.11406	0.406755
	0.908535	0.410223		1.0178	0.428034
	1.09581	0.696684		0.976182	0.489904
	1.00113	0.73313		0.89184	0.515533

## Sheet: Figure 2C
	Figure 2-source data 1
	Figure 2C. Quantification of femoral bone mass in WT, Mek1 KO, Mek2 KO, and dKODmp1 mice.
	Tb. BV/TV					Tb. N
	WT	Mek1 KO	Mek2 KO	dKODmp1		WT	Mek1 KO	Mek2 KO	dKODmp1
	0.1071	0.1316	0.1384	0.345		4.338	3.3497	5.2523	5.553
	0.1418	0.1341	0.0689	0.345		4.713	4.5619	4.2798	6.169
	0.0718	0.0811	0.0623	0.214		4.3641	3.9416	4.3927	6.369
	0.1409	0.1044	0.0823	0.409		3.9042	4.0311	4.6355	5.374
	0.1082	0.1096	0.1028	0.25		4.6389	4.1522	5.4736	5.026
	0.0777					4.344
	0.0857					3.8902
	Tb. Th					Ct. Th
	WT	Mek1 KO	Mek2 KO	dKODmp1		WT	Mek1 KO	Mek2 KO	dKODmp1
	0.0423	0.0435	0.041	0.083		0.1999	0.1607	0.1736	0.2241
	0.0479	0.0478	0.0321	0.071		0.221	0.1784	0.2036	0.2807
	0.034	0.0338	0.03	0.075		0.1732	0.1475	0.1936	0.2618
	0.0602	0.0464	0.0319	0.08		0.2412	0.1974	0.189	0.2133
	0.0394	0.0431	0.0328	0.066		0.1845	0.2097	0.1807	0.2584
	0.0348					0.1845
	0.0424					0.2043

## Sheet: Figure 2D
	Figure 2-source data 1
	Figure 2D. Quantification of skull thickness in WT and dKODmp1 mice.
	Skull Th.
	WT	dKODmp1
	0.1259	0.2082
	0.107	0.1968
	0.122	0.1894
	0.128	0.1829
	0.1292
	0.1104

## Sheet: Figure 2E
	Figure 2-source data 1
	Figure 2E. Quantification of vertebrae bone mass in in WT and dKODmp1 mice.
	Tb. BV/TV
	WT	dKODmp1
	0.2426	0.5915
	0.3146	0.5175
	0.27	0.5674
	0.2123	0.5031

## Sheet: Figure 2F
	Figure 2-source data 1
	Figure 2F. Biomechanical properties of femurs from WT and dKODmp1 mice.
	Maximum Moment			Load at Failure			Bending Stiffness
	WT	dKODmp1		WT	dKODmp1		WT	dKODmp1
	91.65	88.86		26.45	29.34		936.96	457.09
	68.88	117.63		17.54	39		711.76	969.39
	71.25	103.68		14.39	34.48		685.74	651.92
	75.42	99.33		17.76	33.51		957.22	770.57
	73.74	98.13		11.73	32.66		734.65	487.62
	66.78	110.58		16.38	36.9		597.77	953.59

## Sheet: Figure 2G
	Figure 2-source data 1
	Figure 2G. Quantification of dynamic histomorphometry in WT and dKODmp1 mice.
	BFR/BS			MAR
	WT	dKODmp1		WT	dKODmp1
	527.462	837.821		2.2581	2.998
	647.182	938.379		2.6947	3.2993
	832.93	797.525		3.0028	3.281
	602.615	837.31		2.6167	3.282
	508.007	772.924		2.4234	3.0011

## Sheet: Figure 2I
	Figure 2-source data 1
	Figure 2I. Quantification of trabecular bone mass in vehicle or tamoxifen-treated Ctrl and Bglap-Ert mice .
	Tb. BV/TV					Tb. N
	Vehicle		Tamoxifen			Vehicle		Tamoxifen
	Ctrl	Bglap-Ert	Ctrl	dKOBglap-Ert		Ctrl	Bglap-Ert	Ctrl	dKOBglap-Ert
	0.0274	0.0291	0.0155	0.0947		2.472	3.0447	2.6437	3.6334
	0.029	0.0281	0.0196	0.1069		2.9335	2.3083	2.5781	4.4089
	0.0173	0.038	0.0199	0.0897		2.4707	2.1727	2.4866	3.7662
	0.0295		0.0556	0.0846		2.5145		2.867	4.0263
	0.0406		0.0566	0.08		2.7804		3.5591	3.5951
	0.0311		0.044	0.0788		2.8688		3.0848	3.5819
			0.0372	0.0873				2.8846	3.9874
			0.0667	0.1032				3.6582	4.2191
			0.0646	0.1152				3.2027	4.3346
			0.0566	0.0981				3.9298	4.3387
			0.0792	0.101				4.15	4.3213
				0.1231					4.5944

## Sheet: Figure 2K
	Figure 2-source data 1
	Figure 2K. Numbers of osteocytes and empty lacunae in WT and dKODmp1 mice.
	N. Ot/B. Ar			Empty lacunae
	WT	dKODmp1		WT	dKODmp1
	988.528	380.387		1.32743	34.4156
	802.395	378.389		0.555556	49.7382
	838.744	332.911		3.15315	51.8072
	947.339	348.009		1.5444	53.7572
	1014.61	356.043		1.60643	51.8717
	1041.84	308.196		1.93798	59.0909
