# Supplementary material for: Biphasic regulation of osteoblast development via the ERK MAPK–mTOR pathway
Source: eLife journal article supplement (doi:10.7554/elife.78069), 2022-08-17
Supplement: supp [file elife-78069-supp-v1.zip › elife_poa_e78069_Figure_3_figure_supplement_1_source_data_1.xlsx]

## Sheet: File info
	Figure 3-figure supplement 1-source data 1
	Source data for Figure 3-figure supplement 1A-F

## Sheet: Figure 3-figure supplement 1A
	Figure 3-figure supplement 1-source data 1
	Figure 3-figure supplement 1A. Col1a1 mRNA levels in Obs.
	WT	Mek1 KO	Mek2 KO	MEK1/2 dKO
	1.00767	1.26841	2.00004	5.14448
	0.94936	1.17448	1.90267	4.62683
	1.05192	1.27194	2.03077	5.07717
	0.991047	1.17774	1.93191	4.5663

## Sheet: Figure 3-figure supplement 1B
	Figure 3-figure supplement 1-source data 1
	Figure 3-figure supplement 1B. ALP activity in Ctrl and dKO Obs.
		Ctrl						dKO
	GM	0.898713	1.03094	0.996976	1.00988	1.04526	1.006	1.88201	1.95937	1.71599	2.12882	1.54441	1.72867
	OIM	2.91721	3.52692	4.0885	3.10713	4.01861	3.80705	6.20856	6.39862	6.00025	6.27475	6.61213	6.88256

## Sheet: Figure 3-figure supplement 1C
	Figure 3-figure supplement 1-source data 1
	Figure 3-figure supplement 1C. Osteogenic gene expression in Ctrl and dKO Obs.
	Col1a1 mRNA
		Ctrl				dKO
	GM	1.02486	0.968904	1.03127	0.974967	2.49566	2.27115	2.30605	2.09859
	OIM	1.9909	1.90584	2.0243	1.93781	5.16019	4.87508	4.69923	4.43959
	Bglap mRNA
		Ctrl				dKO
	GM	1.00057	0.945942	1.05469	0.997109	2.12995	1.93834	1.96812	1.79107
	OIM	1.33221	1.27529	1.49466	1.4308	2.8616	2.70349	2.56475	2.42305

## Sheet: Figure 3-figure supplement 1D
	Figure 3-figure supplement 1-source data 1
	Figure 3-figure supplement 1D. Cell proliferation in Ctrl and dKO Obs.
		Ctrl					dKO
	0 d	0.967297	1.02195	0.939724	1.02521	1.04582	0.766594	0.734525	0.795615	0.645169	0.651903
	3 d	1.58785	1.52381	1.5412	1.56851	1.58679	0.790545	0.735381	0.737078	0.739999	0.795547
	6 d	1.64949	1.6265	1.63933	1.74553	1.68916	0.908552	0.803046	1.13637	0.96007	1.03922

## Sheet: Figure 3-figure supplement 1E
	Figure 3-figure supplement 1-source data 1
	Figure 3-figure supplement 1E. ALP activity in Ctrl and dKO Obs.
		Ctrl												dKO
	0 d	1.10586	1.12033	1.066	0.967793	0.939314	0.888129	1.0476	0.968513	1.01895	1.09439	0.903005	0.863778	1.37412	1.42984	1.51081	1.36422	1.55029	1.29106	1.29207	1.59629	1.28878	1.21477	1.53892	1.33422
	3 d	1.23618	1.13736	1.24458	1.22263	1.33576	1.29889	1.17712	1.21752	1.26545	1.02635	1.24631	1.00551	1.87224	2.494	2.07088	2.4444	2.39672	2.22395	1.99482	2.49311	2.12729	1.71064	1.78669	2.29439
	6 d	2.15902	2.30081	1.90621	2.20563	1.46737	2.84393	2.70238	1.60691	1.96814	2.05709	1.76121	1.67355	4.32522	3.06984	3.26348	3.81051	4.73254	4.77044	4.05937	3.41009	3.18957	1.95228	3.05061	3.25147

## Sheet: Figure 3-figure supplement 1F
	Figure 3-figure supplement 1-source data 1
	Figure 3-figure supplement 1F. Osteogenic genes expression in Ctrl and dKO Obs.
	Alpl mRNA
		Ctrl				dKO
	0 d	0.965781	1.10973	0.895485	1.02895	1.76701	1.66955	1.74205	1.64597
	3 d	1.26777	1.3189	1.28295	1.3347	2.55625	2.46844	2.65226	2.56116
	6 d	2.29105	2.5059	2.33083	2.54942	4.10386	4.0302	4.14732	4.07287
	Ibsp mRNA
		Ctrl				dKO
	0 d	0.886087	0.923738	1.06142	1.06142	1.44903	1.31995	1.24715	1.24715
	3 d	1.80066	1.90003	1.97667	1.97667	4.9547	6.4644	6.24235	6.24235
	6 d	6.44234	7.00191	7.65855	7.65855	12.5558	18.0677	17.7434	17.7434
	Bglap mRNA
		Ctrl				dKO
	0 d	0.886087	0.923738	1.06142	1.06142	1.44903	2.00246	1.26362	1.19392
	3 d	1.12566	1.17106	1.06018	1.10294	2.38469	2.30277	3.14101	3.03312
	6 d	8.21416	8.98449	7.82504	8.55888	19.0526	18.7106	18.0183	17.6948
