# Supplementary material for: Biphasic regulation of osteoblast development via the ERK MAPK–mTOR pathway
Source: eLife journal article supplement (doi:10.7554/elife.78069), 2022-08-17
Supplement: supp [file elife-78069-supp-v1.zip › elife_poa_e78069_Figure_3_figure_supplement_4_source_data_1.xlsx]

## Sheet: File info
	Figure 3-figure supplement 4-source data 1
	Source data for Figure 3-figure supplement 4A, 4C-4E

## Sheet: Figure 3-figure supplement 4A
	Figure 3-figure supplement 4-source data 1
	Figure 3-figure supplement 4A. TopFlash-luc and 3TP-luc activity in Obs.
	TopFlash-luc						3TP-luc
	GM		OIM				GM		OIM
	Ctrl	dKO	Ctrl	dKO			Ctrl	dKO	Ctrl	dKO
	0.752872	0.422978	0.751579	1.98246			1.00092	1.02239	0.72268	2.44464
	1.29402	1.00774	1.14456	1.97193			0.804058	1.16604	0.973128	3.10677
	0.879015	0.447597	0.74807	3.89544			1.05854	0.95185	0.864923	2.79111
	0.834701	0.949355	1.10456	2.75579			1.03248	1.2488	0.96632	3.20853
	1.23962	1.60985	1.25053	2.55789			1.10399	1.10906	1.47331	3.07202

## Sheet: Figure 3-figure supplement 4C
	Figure 3-figure supplement 4-source data 1
	Figure 3-figure supplement 4C. ALP activity in the presence of WNT inhibitors
		Vehicle						WNT inhibitor_0.1 uM						Wnt inhibitor_1 uM
	Ctrl	1.10833	1.38333	0.933333	0.883333	0.808333	0.891667	0.75	0.791667	0.691667	0.791667	0.733333	0.791667	0.566667	0.5	0.616667	0.666667	0.633333	0.541667
	dKO	1.95833	2.08333	1.99167	1.95833	1.89167	2.38333	2.1	1.74167	1.99167	1.95833	1.69167	2.03333	1.25833	1.33333	1.46667	2.09167	1.625	1.58333

## Sheet: Figure 3-figure supplement 4D
	Figure 3-figure supplement 4-source data 1
	Figure 3-figure supplement 4D. ALP activity in the presence of TGF-β inhibitors
		Vehicle						TGF-β inhibitor_0.1 uM						TGF-β inhibitor_1 uM
	Ctrl	1.07143	1	0.928571	0.857143	1.14286	1	0.928571	0.928571	1.07143	1	0.928571	0.928571	0.857143	0.928571	0.928571	0.928571	0.785714	0.785714
	dKO	1.85714	1.92857	1.78571	1.92857	1.85714	1.71429	1.42857	1.28571	1.14286	1.42857	1.35714	1.28571	1	0.928571	0.857143	0.928571	0.928571	1.07143

## Sheet: Figure 3-figure supplement 4E
	Figure 3-figure supplement 4-source data 1
	Figure 3-figure supplement 4E. Expression of osteogenic genes in the presence of WNT inhibitors
	Ibsp mRNA
		Vehicle				WNT inhibitor_1 uM
	Ctrl	0.863835	0.94694	1.04432	1.14485	0.452164	0.486687	0.464378	0.499878
	dKO	1.97194	2.01015	2.19498	2.23754	0.837129	0.829963	1.16445	1.15451
	Col1a1 mRNA
		Vehicle				WNT inhibitor_1 uM
	Ctrl	0.975041	0.919963	1.08309	1.02191	1.17529	1.24079	1.19127	1.25766
	dKO	1.77432	1.77821	1.83242	1.83644	0.85463	0.90516	0.864345	0.915449

## Sheet: Figure 3-figure supplement 4F
	Figure 3-figure supplement 4-source data 1
	Figure 3-figure supplement 4F. Expression of osteogenic genes in the presence of TGF-β inhibitors
	Ibsp mRNA
		Vehicle				TGF-β inhibitor_1 uM
	Ctrl	1.32184	0.840191	1.12373	0.714238	0.419149	0.4379	0.647	0.67579
	dKO	2.66149	3.07477	2.656	3.06852	1.19589	1.41276	1.07751	1.27279
	Bglap mRNA
		Vehicle				TGF-β inhibitor_1 uM
	Ctrl	0.981481	0.917989	1.08532	1.01521	0.767857	0.802249	1.08069	1.12897
	dKO	4.2381	4.88955	5.03042	5.80357	1.11508	1.3168	1.12103	1.32407
