# Supplementary material for: Biphasic regulation of osteoblast development via the ERK MAPK–mTOR pathway
Source: eLife journal article supplement (doi:10.7554/elife.78069), 2022-08-17
Supplement: supp [file elife-78069-supp-v1.zip › elife_poa_e78069_Figure_3_figure_supplement_4_source_data_2.pdf]

IB:  $\beta$ -Catenin

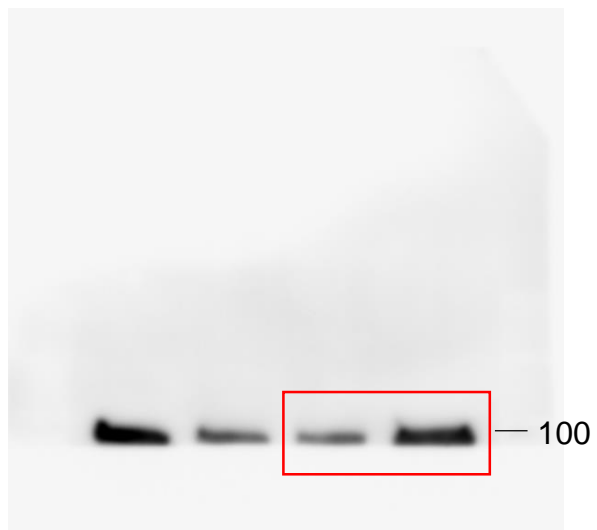

IB: SMAD3

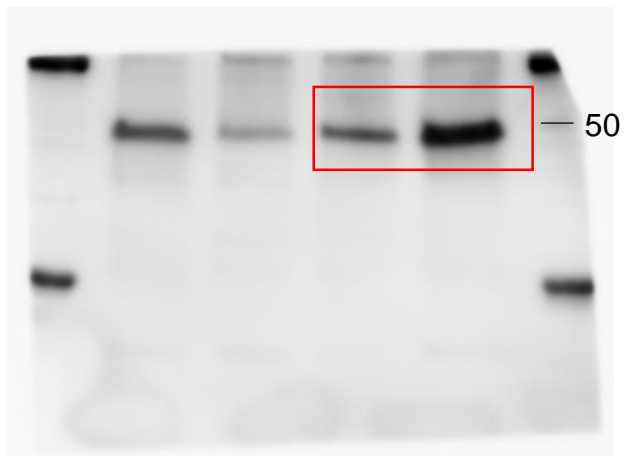

IB: MEK1

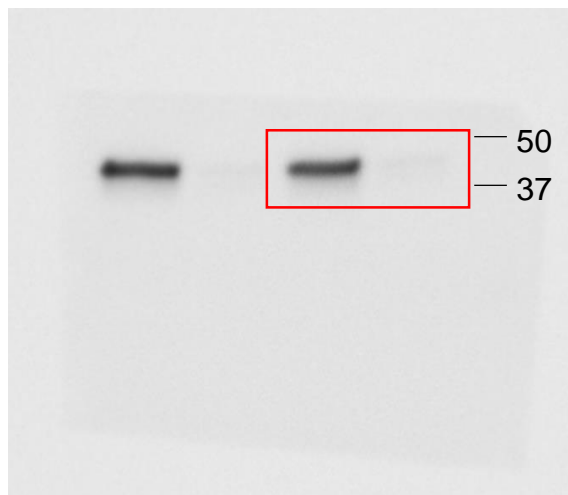

IB: GAPDH

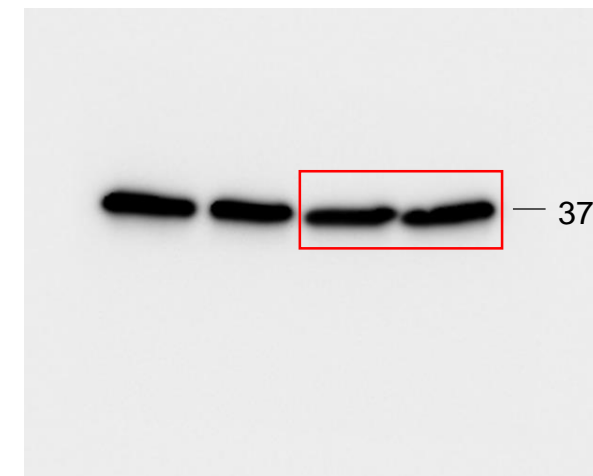

**Figure 3-figure supplement 4-source data 2**  
Full immunoblots for Figure 3-figure supplement 4B
