# Supplementary material for: Biphasic regulation of osteoblast development via the ERK MAPK–mTOR pathway
Source: eLife journal article supplement (doi:10.7554/elife.78069), 2022-08-17
Supplement: supp [file elife-78069-supp-v1.zip › elife_poa_e78069_Figure_3_figure_supplement_5_source_data_1.pdf]

IB: RUNX2

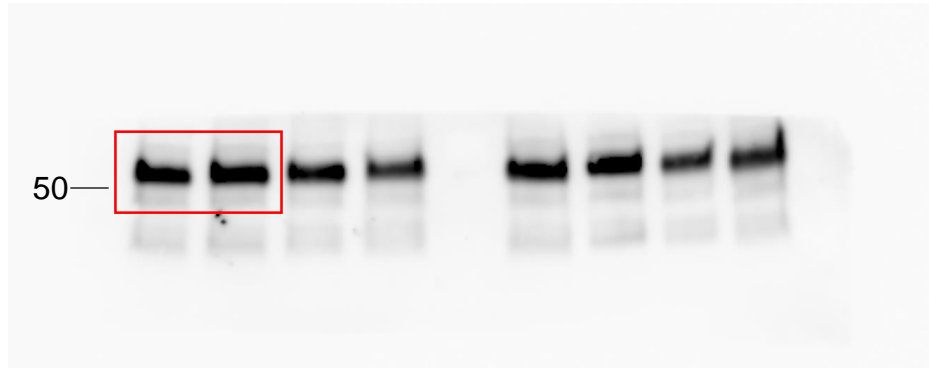

IB: MEK1

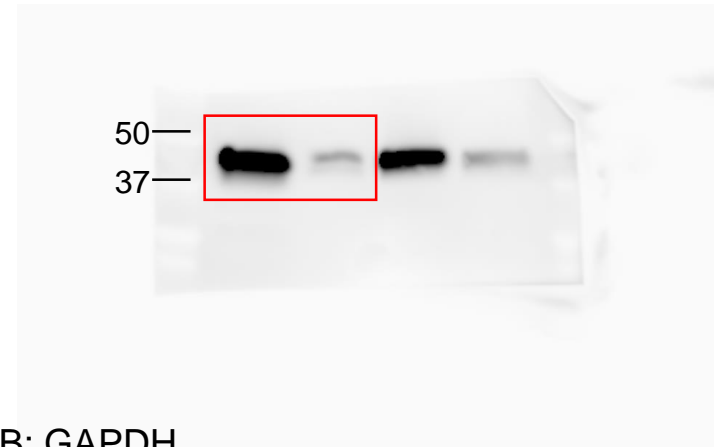

IB: P-ERK1/2

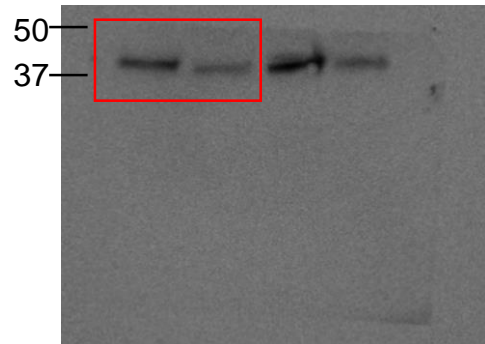

IB: ERK1/2

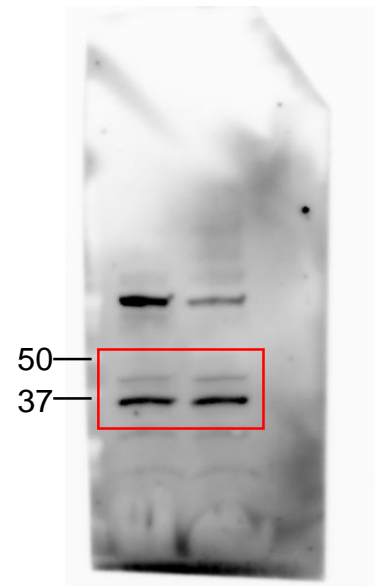

IB: GAPDH

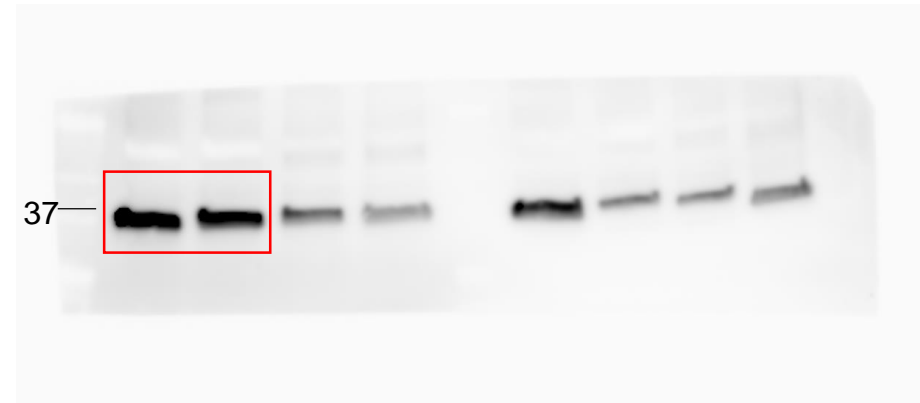

**Figure 3-figure supplement 4-source data 1**  
Full immunoblots for Figure 3-figure supplement 4A
