# Supplementary material for: Biphasic regulation of osteoblast development via the ERK MAPK–mTOR pathway
Source: eLife journal article supplement (doi:10.7554/elife.78069), 2022-08-17
Supplement: supp [file elife-78069-supp-v1.zip › elife_poa_e78069_Figure_3_figure_supplement_5_source_data_2.xlsx]

## Sheet: File info
	Figure 3-figure supplement 5-source data 2
	Source data for Figure 3-figure supplement 5B-E

## Sheet: Figure 3-figure supplement 5B
	Figure 3-figure supplement 5-source data 2
	Figure 3-figure supplement 5B. RUNX2 activity (OG2-luc) in Obs.
	Ctrl	dKO
	0.651937	0.990558
	0.76461	1.18518
	0.597709	1.05202
	0.882706	0.762802
	1.54609	1.00924
	0.995981	1.48524
	1.32376	1.60815
	0.950791	0.929703
	1.2864	0.909819

## Sheet: Figure 3-figure supplement 5C
	Figure 3-figure supplement 5-source data 2
	Figure 3-figure supplement 5C. SP7 activity (SP7-luc) in Obs.
	Ctrl	dKO
	1.2409	1.45246
	0.467587	1.11627
	0.744543	2.36789
	2.07986	0.985718
	0.967991	1.46435
	1.16493	0.795451
	0.440124	1.65863
	1.13749	1.24601
	0.669831	0.875701
	1.08674	0.821077

## Sheet: Figure 3-figure supplement 5D
	Figure 3-figure supplement 5-source data 2
	Figure 3-figure supplement 5D. ATF4 activity (OSE1-luc) in Obs.
	Ctrl	dKO	dKO +sh-Sgk1			Ctrl	dKO	dKO +antimycin A
	0.41939	2.24053	1.73046			1.00167	1.87687	0.940962
	0.940794	2.07428	1.24684			0.95108	4.30516	1.56321
	1.27706	4.04277	1.65867			0.799312	2.403	1.44686
	0.880342	1.97982	0.842559			1.48227	1.73016	1.32038
	1.20527	2.71659	1.22039			0.728487	2.17534	1.45697
	1.27706	2.25186	1.34885			1.03708	2.08934	0.748723

## Sheet: Figure 3-figure supplement 5E
	Figure 3-figure supplement 5-source data 2
	Figure 3-figure supplement 5E. Atf4 mRNA levels in Obs.
	Ctrl	dKO	dKO +sh-Sgk1			Ctrl	dKO	dKO +antimycin A
	1.00593	2.54837	1.11357			0.952729	1.67062	0.722598
	1.02363	2.42303	1.18253			0.967364	1.85308	0.718539
	0.976634	2.51503	0.91626			1.03204	1.63067	0.717001
	0.993821	2.39133	0.972999			1.04789	1.80877	0.712974
