# Supplementary material for: Biphasic regulation of osteoblast development via the ERK MAPK–mTOR pathway
Source: eLife journal article supplement (doi:10.7554/elife.78069), 2022-08-17
Supplement: supp [file elife-78069-supp-v1.zip › elife_poa_e78069_Figure_3_source_data_1.xlsx]

## Sheet: File info
	Figure 3-source data 1
	Source data for Figure 3A-D, H and I

## Sheet: Figure 3A
	Figure 3-source data 1
	Figure 3A. ALP activity in osteoblasts (Obs).
	WT	Mek1 KO	Mek2 KO	MEK1/2 dKO
	0.805675	0.741293	1.22142	1.81006
	0.795364	0.778053	1.09793	1.92202
	1.16027	0.965596	1.33289	1.67037
	0.989426	0.837437	1.10449	1.43418
	1.15786	0.913166	1.18226	1.66034
	1.01153	0.964794	1.16505	1.96764
	1.07829	1.18972	1.01504	2.02232

## Sheet: Figure 3B
	Figure 3-source data 1
	Figure 3B. Quantification of alizarin red staining in Obs.
	WT	Mek1 KO	Mek2 KO	MEK1/2 dKO
	0.401035	0.642846	1.52961	3.47879
	1.01484	0.705836	1.08448	3.91832
	1.01833	1.09497	0.721932	3.80214
	1.17091	0.981941	2.31453	3.26743
	0.87696	0.648096	0.99279	3.33776
	1.35498	0.754129	1.13942	3.72585
	1.16286	0.622549	0.138578	4.3071

## Sheet: Figure 3C
	Figure 3-source data 1
	Figure 3C. Osteogenic gene expresion in Obs.
	Ibsp mRNA
	WT	Mek1 KO	Mek2 KO	MEK1/2 dKO
	1.06955	1.9	5.77972	40.5884
	1.00765	1.75929	5.49835	36.5044
	1.00139	1.83655	5.78773	35.7283
	0.943437	1.70054	5.50597	32.1333

## Sheet: Figure 3D
	Figure 3-source data 1
	Figure 3D. Cell proliferation in Ctrl and dKO Obs.
		Ctrl				dKO
	GM	1.12882	1.02576	0.915518	0.929898	0.766926	0.697424	0.72139	0.668664
	OIM	2.51648	2.63391	2.53325	2.95986	0.922708	0.929898	0.980228	0.910725

## Sheet: Figure 3H
	Figure 3-source data 1
	Figure 3H. ALP activity and Ibsp mRNA levels in CM-treated mouse BMSCs.
	ALP activity			Ibsp mRNA
	Ctrl-CM	dKO-CM		Ctrl-CM	dKO-CM
	0.839286	1.19643		0.942841	1.50215
	1.03571	1.125		0.980714	1.38175
	1.05357	1.26786		1.01785	1.65294
	1.07143	1.25		1.05873	1.52046

## Sheet: Figure 3I
	Figure 3-source data 1
	Figure 3I. Quantification for the number of branches in CM-treated mouse EPOCs tube formation.
	EPOCs tube formation
	Ctrl-CM	dKO-CM	FGF2
	1.1828	1.77419	3.3871
	0.913978	1.50538	3.06452
	0.860215	1.88172	3.01075
	1.07527	1.55914	3.22581
	0.967742	2.15054	3.17204
