# Supplementary material for: Biphasic regulation of osteoblast development via the ERK MAPK–mTOR pathway
Source: eLife journal article supplement (doi:10.7554/elife.78069), 2022-08-17
Supplement: supp [file elife-78069-supp-v1.zip › elife_poa_e78069_Figure_4_figure_supplement_1_source_data_1.xlsx]

## Sheet: File info
	Figure 4-figure supplement 1-source data 1
	Source data for Figure 4-figure supplement 1A

## Sheet: Figure 4-figure supplement 1A
	Figure 4-figure supplement 1-source data 1
	Figure 4-figure supplement 1A. Mitochondrial DNA/nuclear DNA ratio in vehicle or trametinib-treated Obs.
	ND1/Hk2			16srRNA/Hk2
	Vehicle	Trametinib		Vehicle	Trametinib
	1.05587	1.24391		1.00138	1.27601
	0.978194	1.45132		0.927705	1.48876
	1.0205	1.21995		1.075	1.21659
	0.945426	1.42336		0.995915	1.41944
