# Supplementary material for: Biphasic regulation of osteoblast development via the ERK MAPK–mTOR pathway
Source: eLife journal article supplement (doi:10.7554/elife.78069), 2022-08-17
Supplement: supp [file elife-78069-supp-v1.zip › elife_poa_e78069_Figure_4_source_data_1.xlsx]

## Sheet: File info
	Figure 4-source data 1
	Source data for Figure 4A-F and H-L

## Sheet: Figure 4A
	Figure 4-source data 1
	Figure 4A. ALP activity of Ctrl and dKO Obs in the presence or absence of glucose .
		without glucose						with glucose
	Ctrl	1.07143	1.14286	1.14286	1	0.928571	0.857143	1.85714	1.57143	1.57143	1.64286	1.64286	1.57143
	dKO	2.57143	2.35714	3.57143	2.35714	2.64286	2.71429	2.71429	3.42857	2.85714	2.64286	2.64286	2.64286

## Sheet: Figure 4B
	Figure 4-source data 1
	Figure 4B. ALP activity and cell proliferation of BPTES-treated Obs.
	ALP activity
		DMSO (vehicle)					BPTES 0.1 uM					BPTES 1 uM					BPTES 10 uM
	Ctrl	1.15997	0.797502	0.950209	1.03765	1.05115	1.14859	1.01961	1.0392	1.10419	1.07947	1.43851	0.959542	0.902946	1.11878	1.22413	0.599482	0.554565	0.469362	0.665392	0.524327
	dKO	4.7989	4.50951	5.31635	4.90098	5.87712	4.06856	3.61461	3.84777	3.80573	2.81945	3.5387	2.56117	3.92506	3.37008	2.95405	3.07777	2.5606	2.83217	2.55184	3.09849
	Cell proliferation
		DMSO (vehicle)						BPTES 10 uM
	Ctrl	6544.64	6923.48	7014.52	7492.31	7067.17	7637.99	4702.98	4300.11	4202.07	4204.5	4406.18	4651.95
	dKO	4128.63	4273.1	4332.85	4856.08	4716.39	4641.6	1084.64	720.543	859.991	863.319	806.125	864.197

## Sheet: Figure 4C
	Figure 4-source data 1
	Figure 4C. Osteogenic gene expression in BPTES-treated Obs.
	Ibsp mRNA
		Vehicle				BPTES
	Ctrl	1.04644	1.0953	0.907929	0.950321	0.291177	0.265139	0.552671	0.50325
	dKO	2.30747	2.20802	2.25048	2.15348	0.224717	0.176628	0.250333	0.196762
	Col1a1 mRNA
		Vehicle				BPTES
	Ctrl	0.950441	1.07493	0.92663	1.048	0.527368	0.612653	0.548622	0.637346
	dKO	5.57855	6.78692	6.10878	7.432	0.882365	1.10149	1.00183	1.25063

## Sheet: Figure 4D
	Figure 4-source data 1
	Figure 4D. mRNA levels of Gls in Ctrl and dKO Obs.
	Gls mRNA
		Ctrl				dKO
	0 d	0.913128	1.09956	0.901607	1.08569	0.877455	0.854714	0.940744	0.916361
	3 d	1.10988	0.826114	1.18327	0.88074	1.92203	2.04491	1.80682	1.92233
	6 d	0.925113	1.00655	0.990571	1.07776	2.54259	2.67657	2.65233	2.79209

## Sheet: Figure 4E
	Figure 4-source data 1
	Figure 4E. Levels of glutamate in Ctrl and dKO Obs.
	Glutamate release
	Ctrl	dKO
	85.2264	95.9897
	74.8034	103.374
	84.2581	94.5502
	80.3789	94.9074
	84.3345	91.3227
	77.4873	103.284
	83.3369	99.1927

## Sheet: Figure 4F
	Figure 4-source data 1
	Figure 4F. Intracellular ATP levels.
	ATP levels
	Ctrl	dKO
	7025.25	9719.78
	7496.4	9752.6
	7574.95	8135.97
	5950.47	8637.05
	4876.22	9144.68
	6484.36	7515.28

## Sheet: Figure 4H
	Figure 4-source data 1
	Figure 4H. Numbers of median fluorescence intensity from Mitotracker or TMRE-treated Ctrl and dKO Obs.
	Mitochondrial mass (Mitotracker)
	Ctrl	dKO
	1.035	3.26131
	1.00856	2.95453
	1.02319	2.88671
	1.02612	2.78791
	0.907137	3.04162
	Mitochondrial membrane potential (TMRE)
	Ctrl	dKO
	1.16542	1.59976
	0.852822	1.48753
	1.03497	1.59048
	1.07152	1.67121
	0.875267	1.57214

## Sheet: Figure 4I
	Figure 4-source data 1
	Figure 4I. The ratio of mitochondrial DNA to nuclear DNA in Ctrl and dKO Obs.
	ND1/Hk2			16srRNA/Hk2
	Ctrl	dKO		Ctrl	dKO
	0.949933	1.74704		0.948422	1.75497
	1.07288	1.83632		1.07118	1.84466
	0.928505	1.72244		0.930015	1.68682
	1.04868	1.81046		1.05039	1.77303

## Sheet: Figure 4J
	Figure 4-source data 1
	Figure 4J. OCR in Ctrl and dKO Obs.
	Ctrl	dKO
	0.985527	1.95715
	1.14745	1.71727
	1.14166	1.83815
	0.964359	1.83591
	0.851675	1.56645
	0.909247	1.85505

[truncated: 2 more sheets: Figure 4K, Figure 4L]
