# Supplementary material for: Biphasic regulation of osteoblast development via the ERK MAPK–mTOR pathway
Source: eLife journal article supplement (doi:10.7554/elife.78069), 2022-08-17
Supplement: supp [file elife-78069-supp-v1.zip › elife_poa_e78069_Figure_5_figure_supplement_1_source_data_1.pdf]

IB: P-AKT

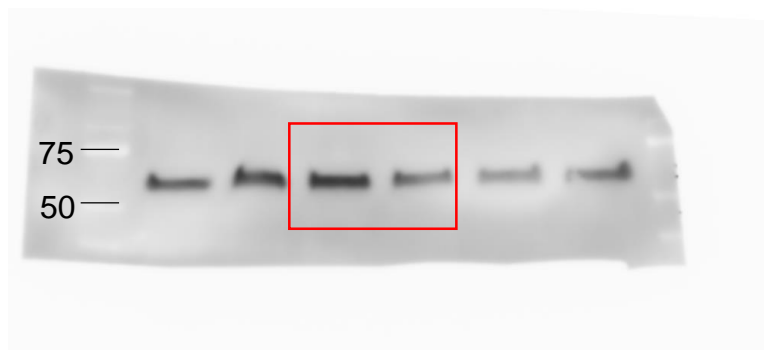

IB: P-SGK1

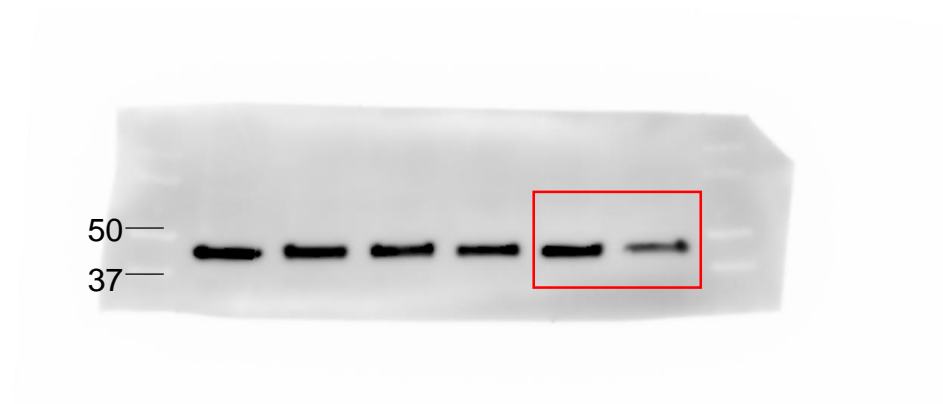

IB: P-p70S6K

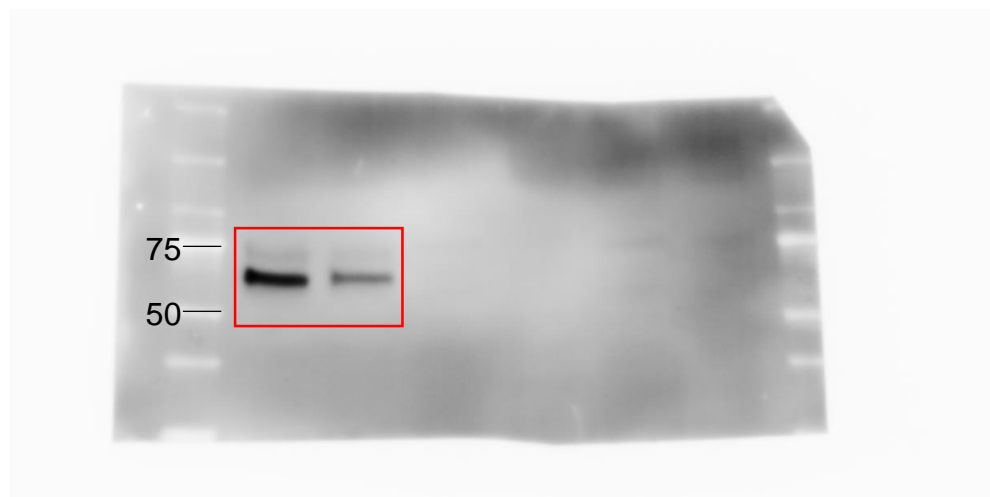

IB: GAPDH

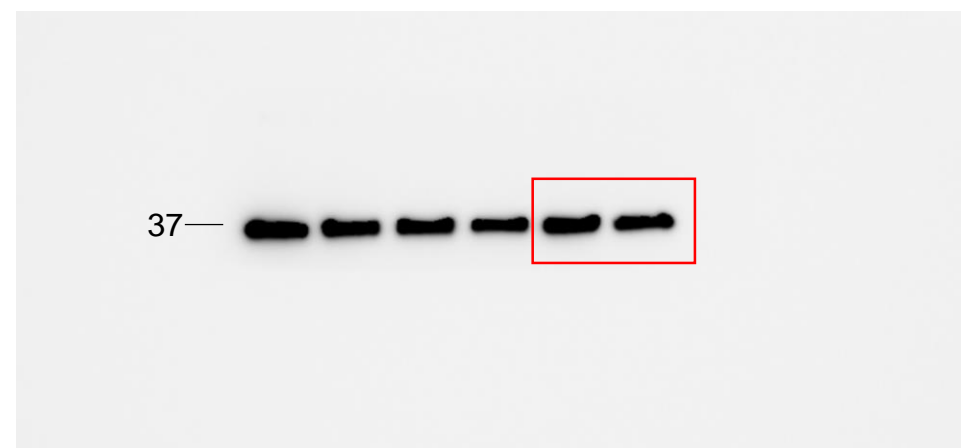

**Figure 5-figure supplement 1-source data 1**  
Full immunoblots for Figure 5-figure supplement 1

IB: AKT1

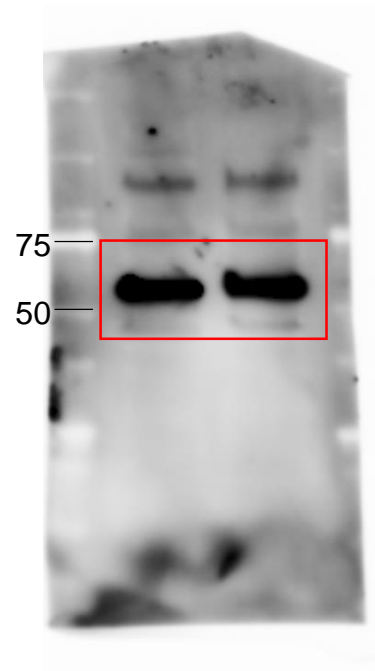

IB: SGK1

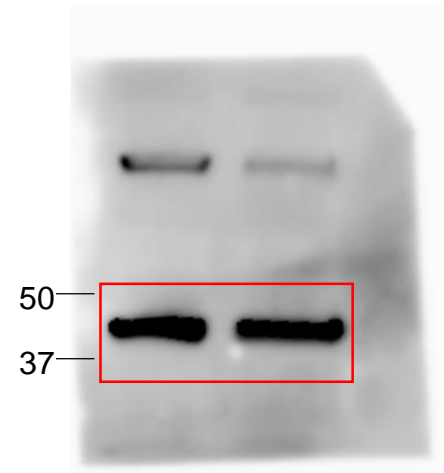

IB: p70S6K

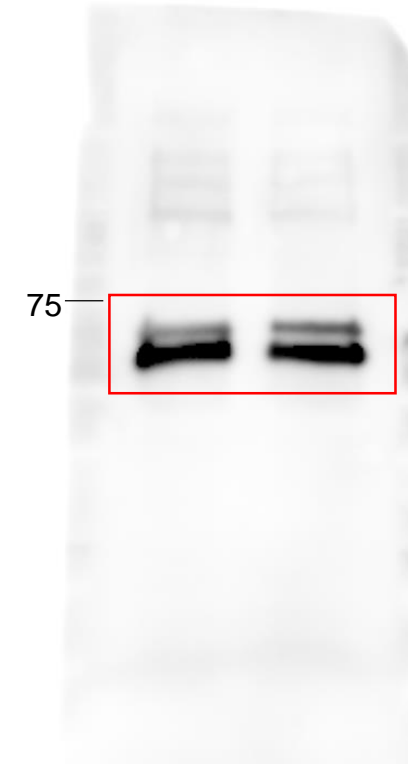

**Figure 5-figure supplement 1-source data 1**  
Full immunoblots for Figure 5-figure supplement 1
