# Supplementary material for: Biphasic regulation of osteoblast development via the ERK MAPK–mTOR pathway
Source: eLife journal article supplement (doi:10.7554/elife.78069), 2022-08-17
Supplement: supp [file elife-78069-supp-v1.zip › elife_poa_e78069_Figure_5_source_data_1.xlsx]

## Sheet: File info
	Figure 5-source data 1
	Source data for Figure 5B, C and E-G

## Sheet: Figure 5B
	Figure 5-source data 1
	Figure 5B. ALP activity of rapamycin-treated Ctrl and dKO Obs.
		Rapamycin (uM)
		0						0.1						1						10
	Ctrl	1.08333	0.916667	1.08333	1	1.25	0.833333	0.916667	0.916667	0.916667	1	1	0.75	0.916667	0.916667	0.833333	0.75	0.916667	0.833333	0.833333	0.75	0.75	0.833333	0.75	0.75
	dKO	3	3	2.58333	3.58333	3.41667	3.33333	2.33333	2.25	2	2.25	2.08333	2	1.91667	2.16667	2	2	1.75	1.75	1.83333	1.83333	1.58333	1.66667	1.58333	1.41667

## Sheet: Figure 5C
	Figure 5-source data 1
	Figure 5C. Osteogenic marker expression in rapamycin-treated Ctrl and dKO Obs.
	Col1a1 mRNA
		Vehicle				Rapamycin
	Ctrl	2.29062	1.39458	1.87852	1.14369	0.552462	0.601602	0.489667	0.533222
	dKO	4.471	4.62266	6.32882	6.5435	1.83555	1.88156	2.19766	2.25275
	Ibsp mRNA
		Vehicle				Rapamycin
	Ctrl	0.86138	0.912018	1.08152	1.14509	0.430295	0.454417	0.323327	0.341447
	dKO	11.832	13.9109	10.289	12.0968	3.22795	2.44919	2.85742	2.16805

## Sheet: Figure 5E
	Figure 5-source data 1
	Figure 5E. Quantification of femoral bone mass in rapamycin-treated mice.
	Tb. BV/TV
		Vehicle					Rapamycin
	Ctrl	0.1586	0.1314	0.1599	0.1414	0.1574	0.1075	0.1836	0.1603	0.1316	0.1373
	dKODmp1	0.2212	0.1905	0.3628	0.3399	0.3029	0.1354	0.1491	0.2133	0.1341	0.1538
	Tb. N
		Vehicle					Rapamycin
	Ctrl	5.7643	5.1839	5.7209	5.519	5.7441	4.4795	5.9152	5.4909	5.0847	5.6224
	dKODmp1	6.4652	5.4961	9.8339	7.3401	7.3628	4.971	5.4194	6.7755	5.7962	5.9663
	Tb. Th
		Vehicle					Rapamycin
	Ctrl	0.0389	0.036	0.0392	0.0402	0.0379	0.0355	0.0402	0.0397	0.0377	0.0352
	dKODmp1	0.0455	0.0443	0.0447	0.0554	0.0475	0.0394	0.0393	0.0418	0.0337	0.0361
	Ct. Th
		Vehicle					Rapamycin
	Ctrl	0.205	0.2	0.232	0.22	0.177	0.166	0.161	0.167	0.182	0.175
	dKODmp1	0.25	0.244	0.219	0.253	0.237	0.155	0.155	0.136	0.148	0.156

## Sheet: Figure 5F
	Figure 5-source data 1
	Figure 5F. Numbers of osteocytes and empty lacunae in rapamycin-treated mice.
	N. Ot/B. Ar			Empty lacunae
	Ctrl	dKODmp1		Ctrl	dKODmp1
	691.637	744.425		3.59712	2.66667
	492.078	548.227		5.55556	2.54237
	515.368	358.603		7.89474	16.4557
	640.446	633.193		6.10687	8.95522
	520.025	454.711		0	19.1919
	444.742	459.186		4.12371	1.04167

## Sheet: Figure 5G
	Figure 5-source data 1
	Figure 5G. Quantification of osteoclast surface/bone surface in rapamycin-treated mice.
	Oc. S/BS
	Ctrl	dKODmp1
	7.3775	7.0378
	8.032	6.6
	8.345	5.1485
	8.6131	4.4078
	5.2886	4.4337
	3.5572	4.4069
	5.2282	3.6164
	7.8644	2.9513
