# Supplementary material for: Biphasic regulation of osteoblast development via the ERK MAPK–mTOR pathway
Source: eLife journal article supplement (doi:10.7554/elife.78069), 2022-08-17
Supplement: supp [file elife-78069-supp-v1.zip › elife_poa_e78069_Figure_6_source_data_1.pdf]

IB: P-p70S6K

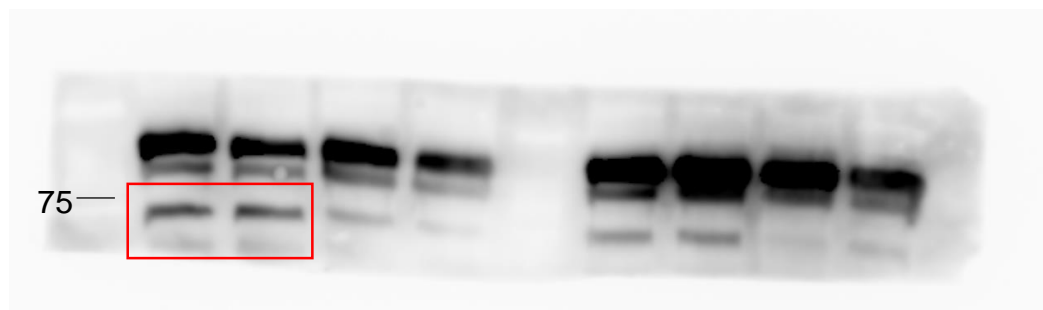

IB: P-4EBP1

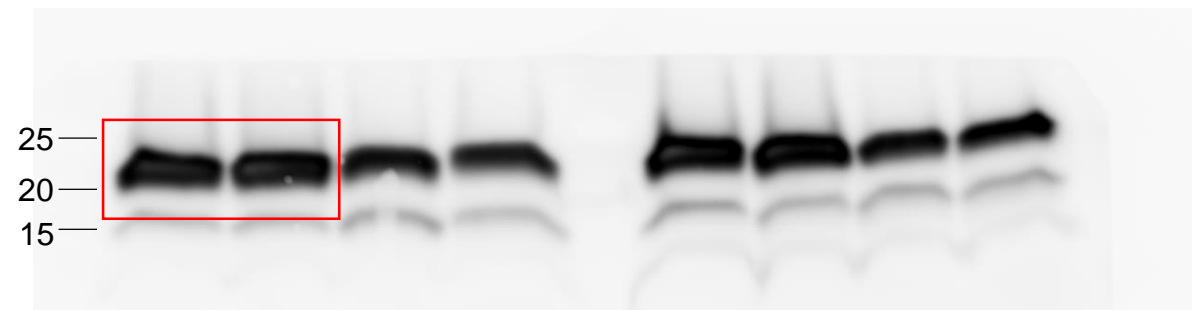

IB: P-ERK1/2

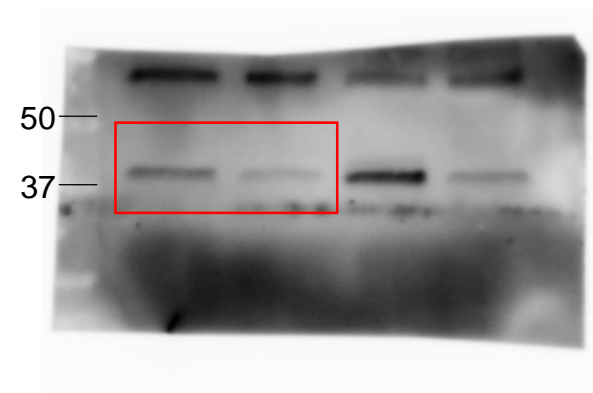

IB: MEK1

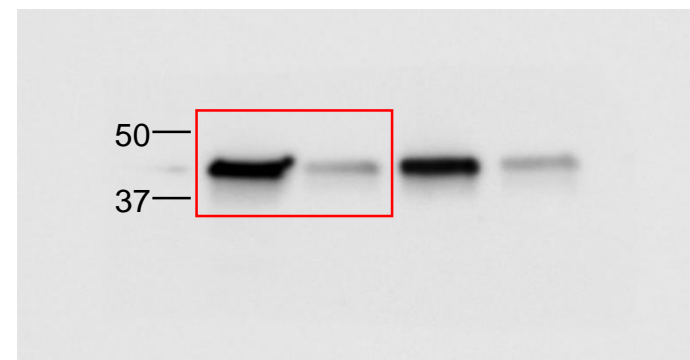

IB: GAPDH

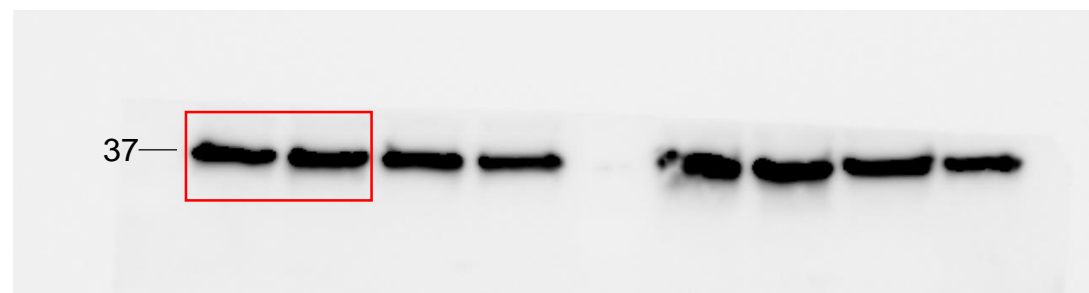

**Figure 6-source data 1**

Full immunoblots for Figure 6A (left)

IB: p70S6K

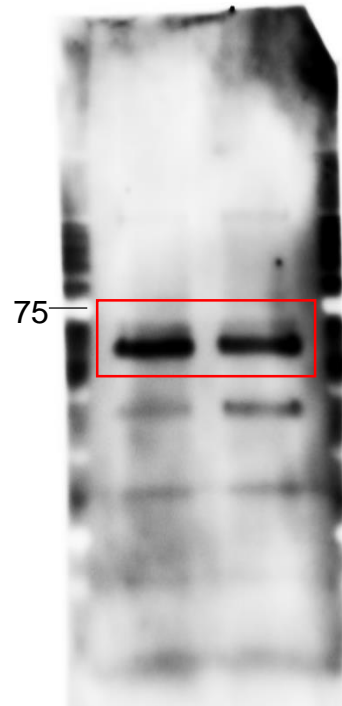

IB: 4EBP1

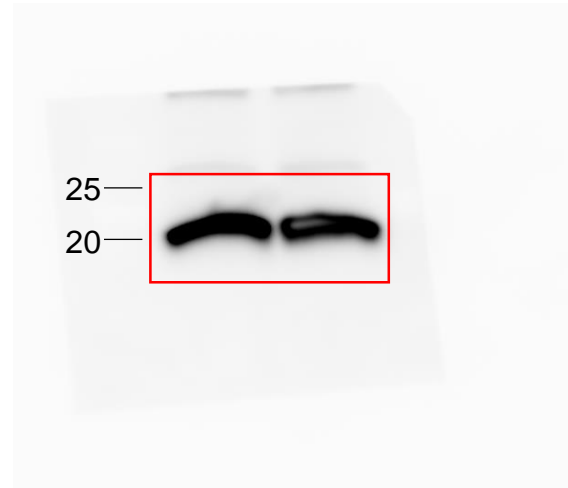

IB: ERK1/2

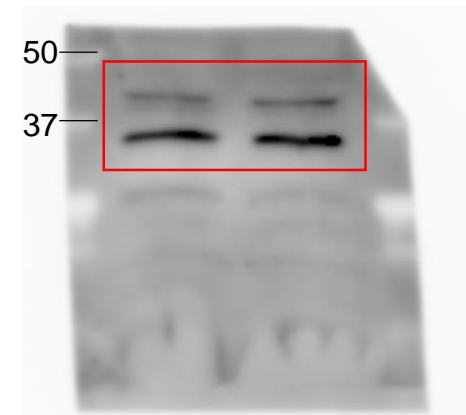

**Figure 6-source data 1**  
Full immunoblots for Figure 6A (left)

IB: P-AKT

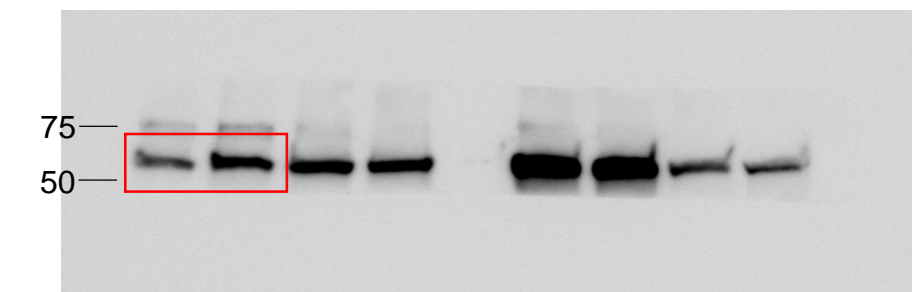

IB: P-SGK1

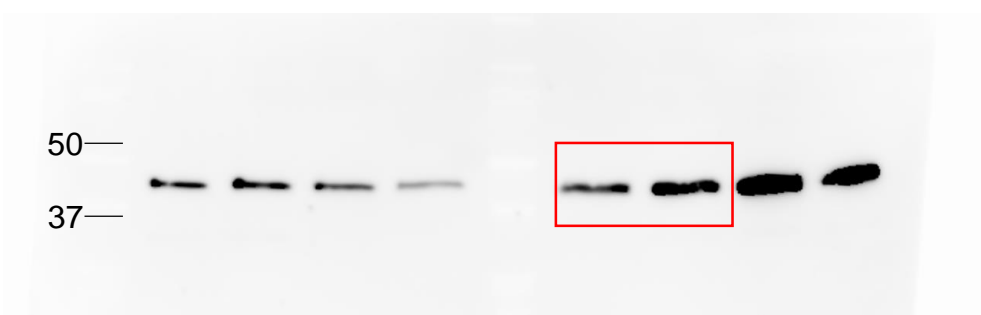

IB: P-NDRG1

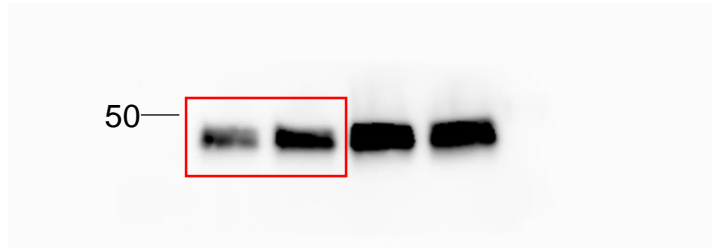

IB: GAPDH

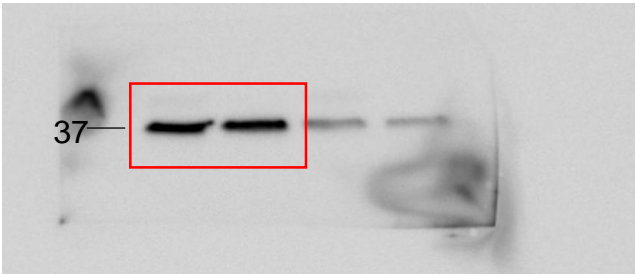

**Figure 6-source data 1**  
Full immunoblots for Figure 6A (right)

IB: AKT1

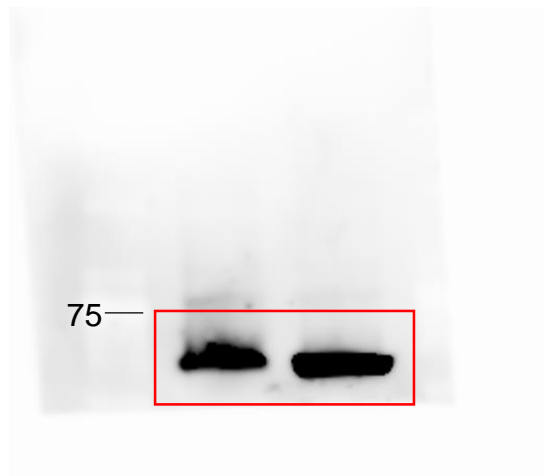

IB: SGK1

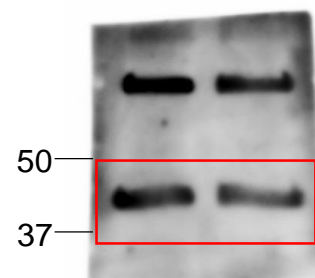

IB: NDRG1

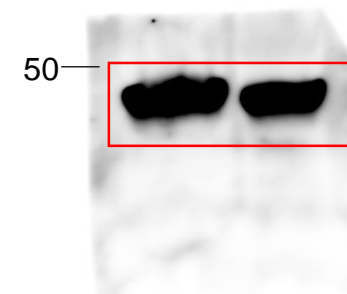

**Figure 6-source data 1**  
Full immunoblots for Figure 6A (right)
