# Supplementary material for: Biphasic regulation of osteoblast development via the ERK MAPK–mTOR pathway
Source: eLife journal article supplement (doi:10.7554/elife.78069), 2022-08-17
Supplement: supp [file elife-78069-supp-v1.zip › elife_poa_e78069_Figure_6_source_data_2.xlsx]

## Sheet: File info
	Figure 6-source data 2
	Source data for Figure 6B-F and H

## Sheet: Figure 6B
	Figure 6-source data 2
	Figure 6B. ALP activity in Ctrl and dKO Obs expressing sh-Scr or sh-Sgk1 shRNAs.
		sh-Scr						sh-Sgk1
	Ctrl	1.22964	1.08002	0.926213	1.02327	0.947581	0.886714	0.931829	0.688174	0.848183	0.902961	0.943184	0.818074
	dKO	1.94832	1.90412	1.78504	2.1097	1.90412	1.8431	1.37098	1.42508	1.26448	1.37425	1.10956	1.35659

## Sheet: Figure 6C
	Figure 6-source data 2
	Figure 6C. Osteogenic marker expression in Ctrl and dKO Obs expressing sh-Scr or sh-Sgk1 shRNAs.
	Mek1 mRNA
		sh-Scr				sh-Sgk1
	Ctrl	0.980521	0.994861	0.980521	1.04411	1.40956	1.3496	1.40956	1.23383
	dKO	0.31381	0.306455	0.31381	0.242864	0.409248	0.342546	0.409248	0.306904
	Sgk1 mRNA
		sh-Scr				sh-Sgk1
	Ctrl	1.03775	1.04325	0.956961	0.962033	0.711743	0.695275	0.390094	0.381068
	dKO	0.794683	0.822163	0.671397	0.694614	0.417473	0.453676	0.538847	0.585577
	Ibsp mRNA
		sh-Scr				sh-Sgk1
	Ctrl	1.09627	1.11216	0.888923	0.901806	2.14305	2.14556	2.3694	2.37217
	dKO	6.06704	6.49792	6.17006	6.60826	2.2858	2.42305	2.25939	2.39506

## Sheet: Figure 6D
	Figure 6-source data 2
	Figure 6D. Mineralization in Ctrl and dKO Obs expressing sh-Scr or sh-Sgk1 shRNAs.
	Ctrl	dKO
	0.64	0.399
	0.627	0.578
	0.905	0.405
	0.998	0.44
	1.08	0.536
	1.284	0.337

## Sheet: Figure 6E
	Figure 6-source data 2
	Figure 6E. Migration of CM-treated mouse EPOCs.
	Ctrl-CM	dKO-CM	dKO+sh-Sgk1-CM
	0.900823	1.23793	0.57659
	1.08322	1.23245	0.754622
	0.987818	1.46076	0.782449
	1.12133	1.42386	0.52294
	0.906812	1.34026	0.451555

## Sheet: Figure 6F
	Figure 6-source data 2
	Figure 6F. ALP activity and Col1a1 mRNA levels of CM-treated BMSCs.
	ALP activity				Col1a1 mRNA
	Ctrl-CM	dKO-CM	dKO+sh-Sgk1-CM		Ctrl-CM	dKO-CM	dKO+sh-Sgk1-CM
	1.06759	1.21179	0.818914		1.0494	1.31052	0.893057
	0.989236	1.32184	0.804434		0.959597	1.30198	0.895978
	0.832992	1.34946	0.738003		1.04	1.27806	0.929382
	0.967828	1.36739	0.740868		0.951001	1.26973	0.932421
	1.23701	1.19432	0.767884
	0.904878	1.31819	0.836857

## Sheet: Figure 6H
	Figure 6-source data 2
	Figure 6H. OCR in Ctrl and dKO Obs expressing sh-Scr or sh-Sgk1 shRNAs.
	Ctrl	dKO	dKO+sh-Sgk1
	1.275	2.10268	1.60028
	1.05332	1.61526	1.47399
	1.03704	1.61525	1.87503
	0.742676	2.16498	1.69447
	0.960585	1.71818	1.69563
	0.931592	2.5106	1.91687
