# Supplementary figures and images for: Biphasic regulation of osteoblast development via the ERK MAPK–mTOR pathway
Source: eLife journal article supplement (doi:10.7554/elife.78069), 2022-08-17

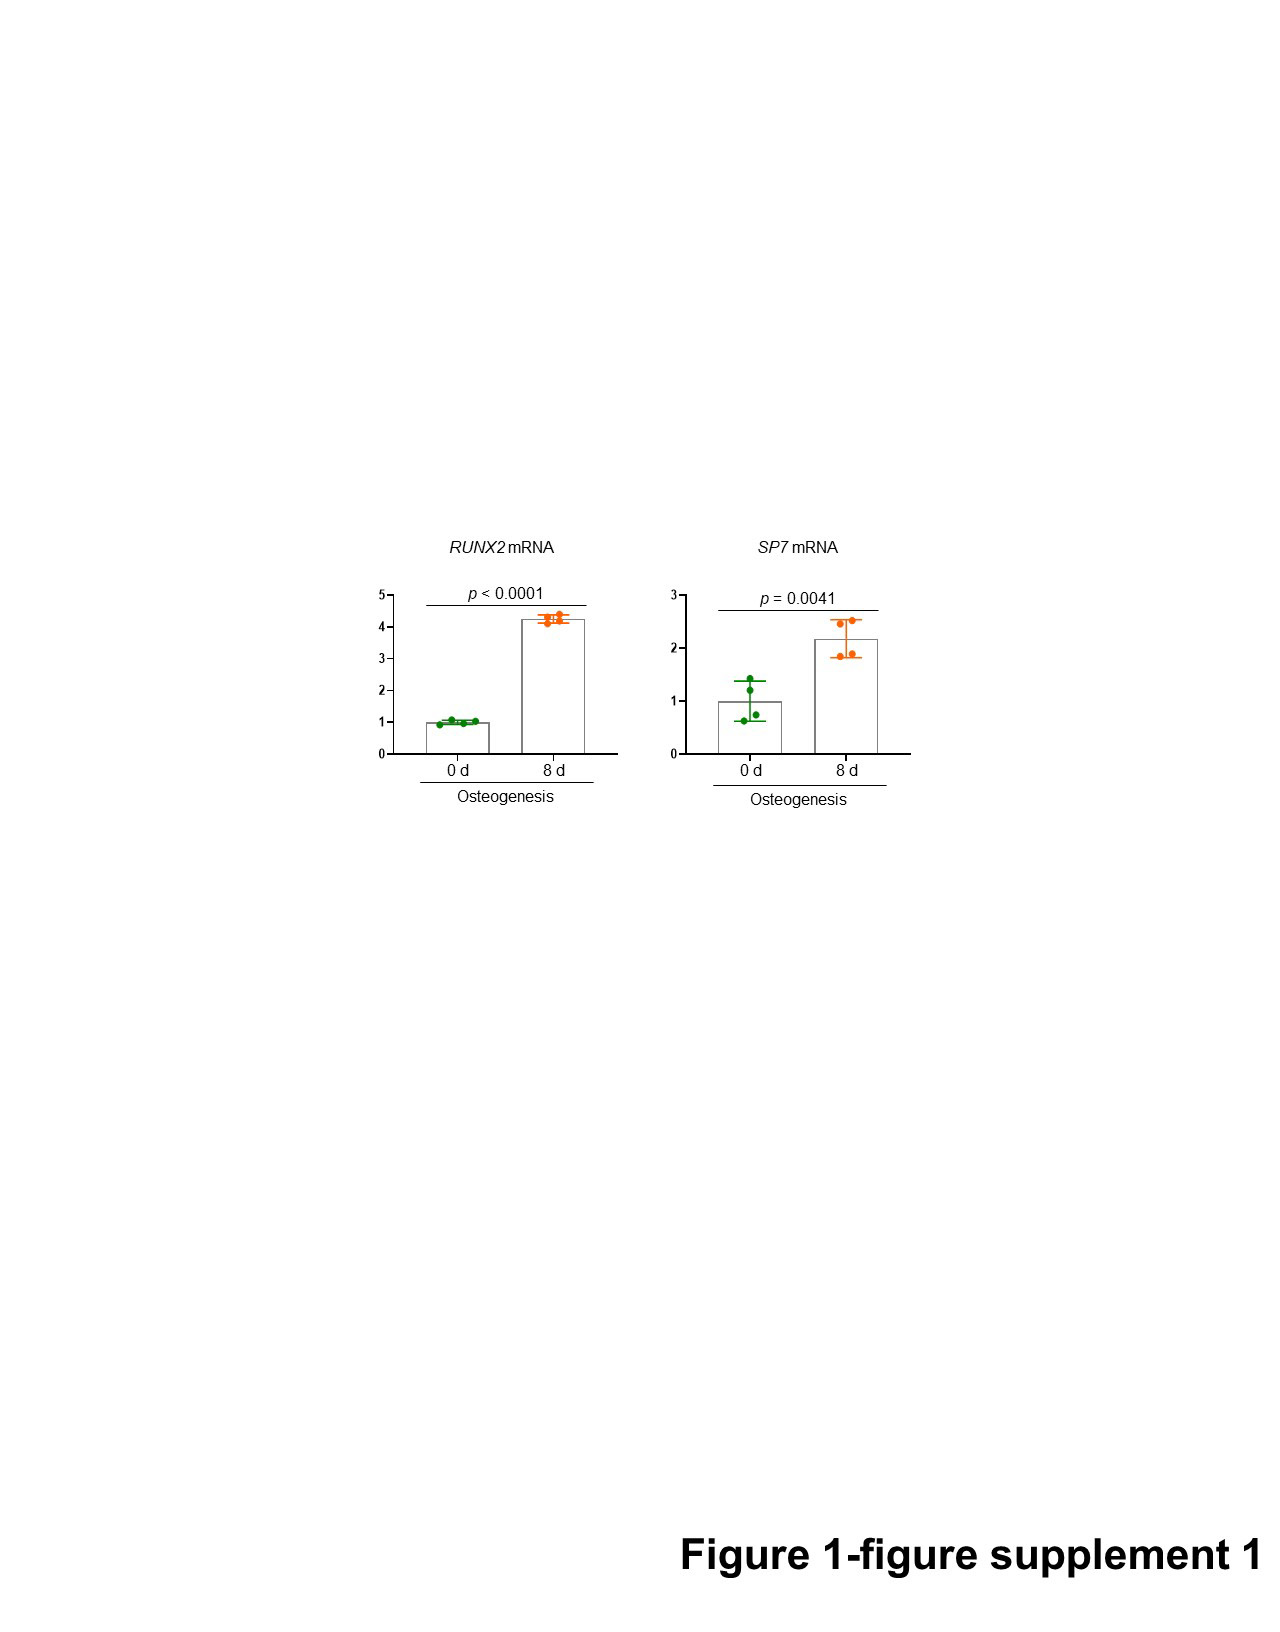

Supplement: supp [file elife-78069-supp-v1.zip › elife_poa_e78069_Figure_1_figure_supplement_1.jpg]

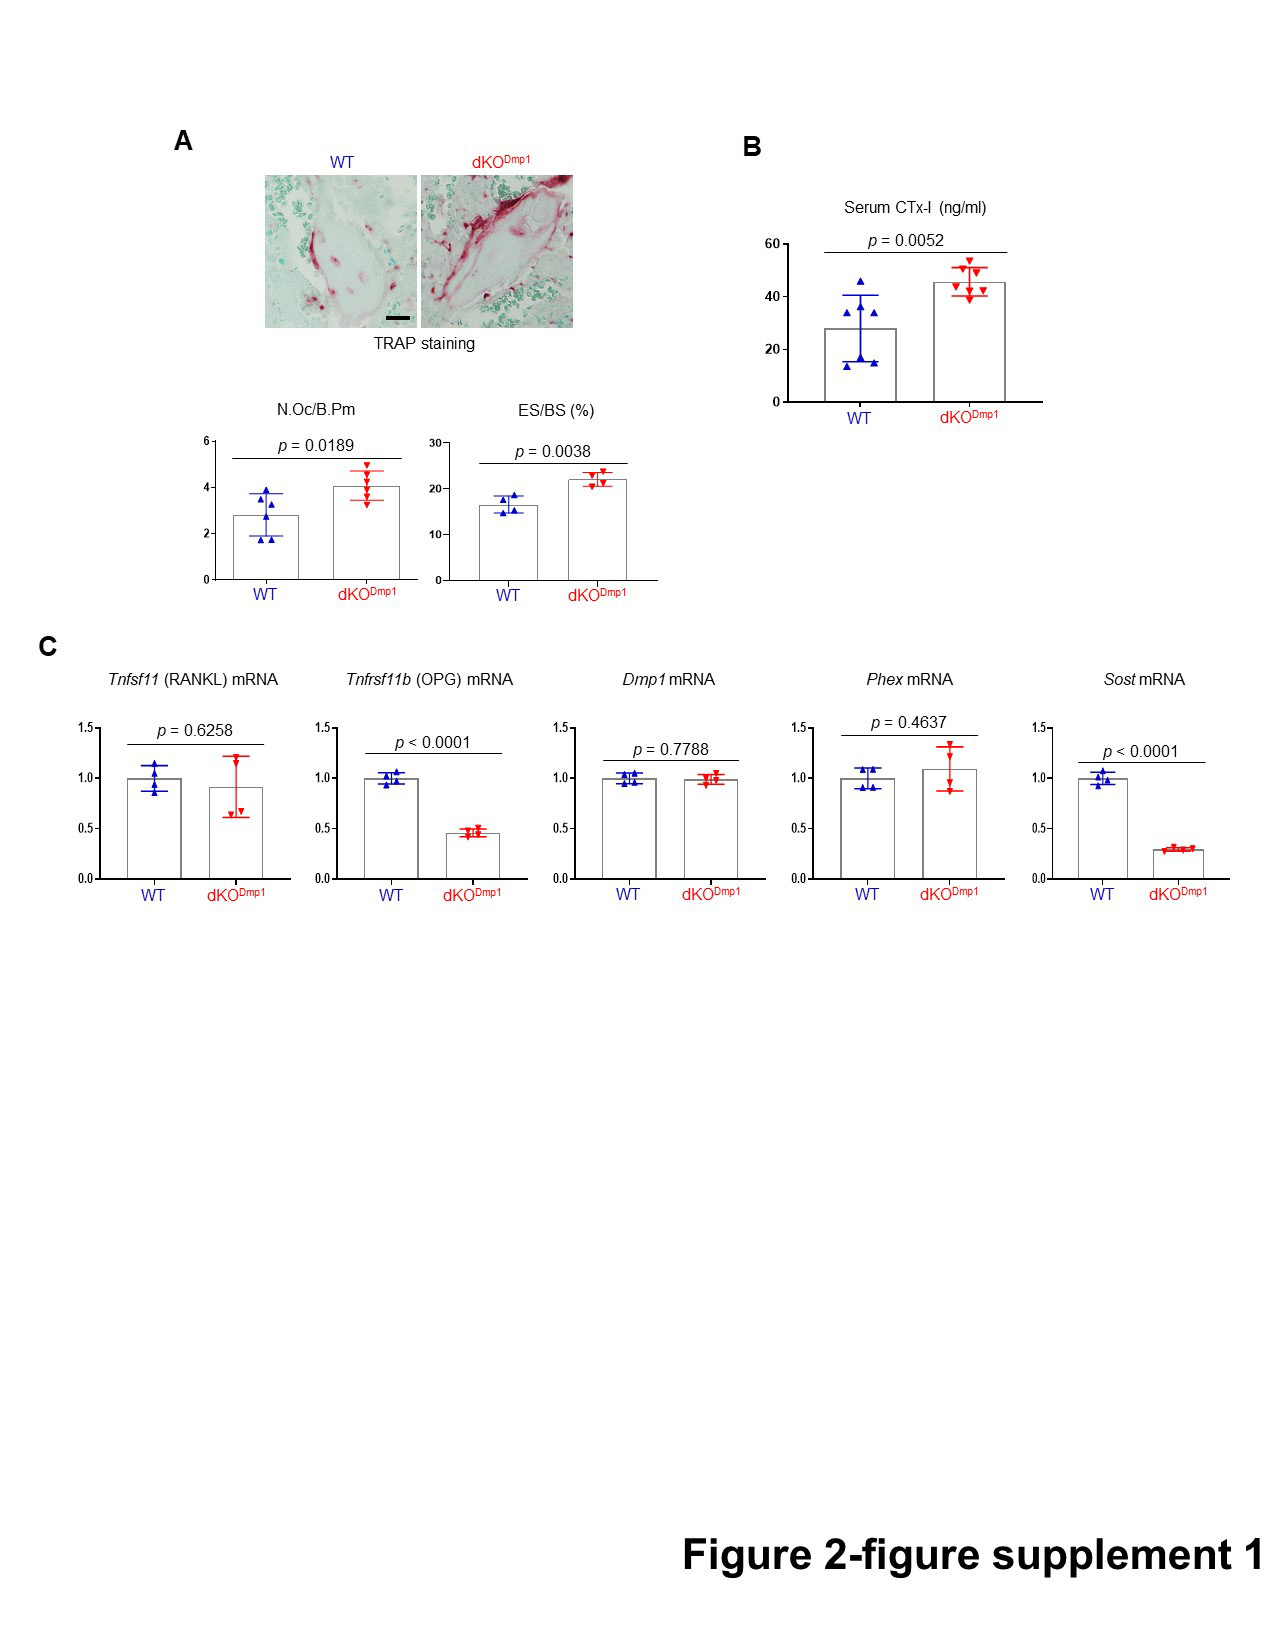

Supplement: supp [file elife-78069-supp-v1.zip › elife_poa_e78069_Figure_2_figure_supplement_1.jpg]

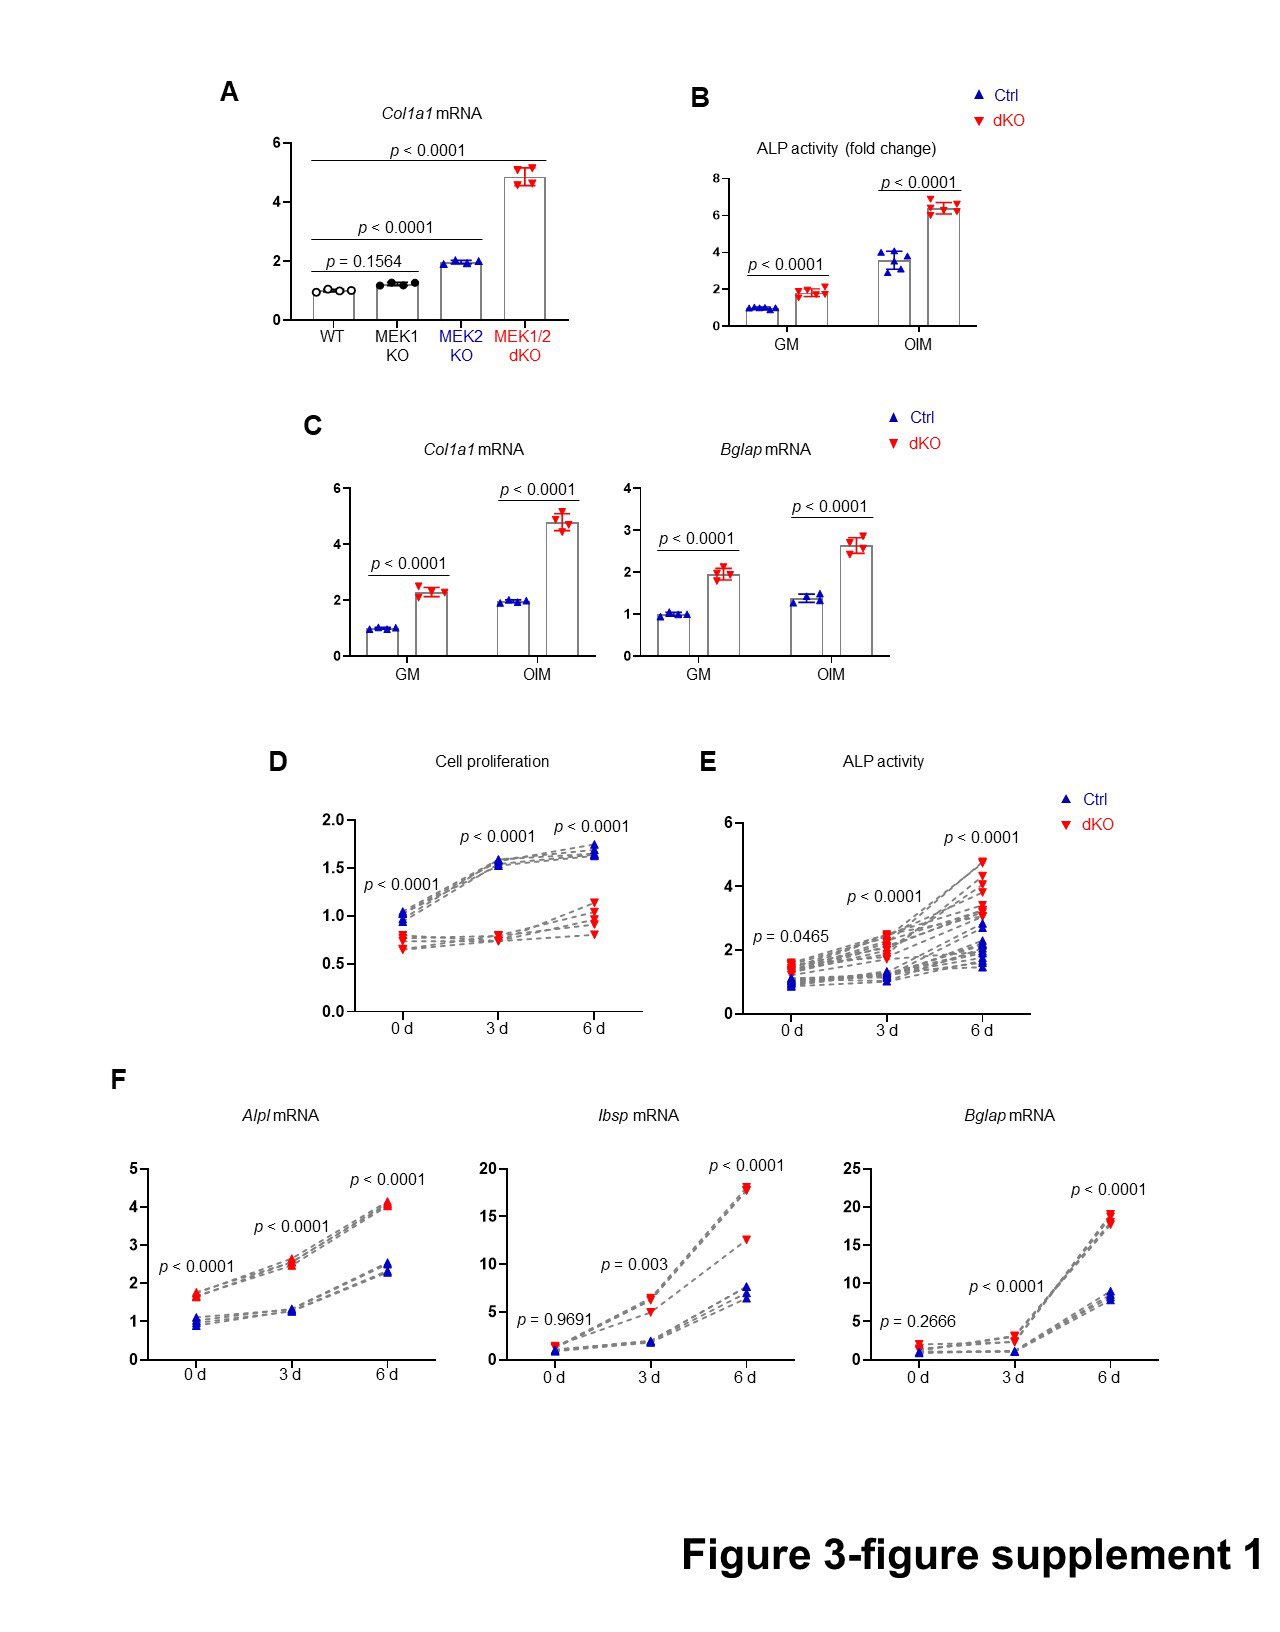

Supplement: supp [file elife-78069-supp-v1.zip › elife_poa_e78069_Figure_3_figure_supplement_1.jpg]

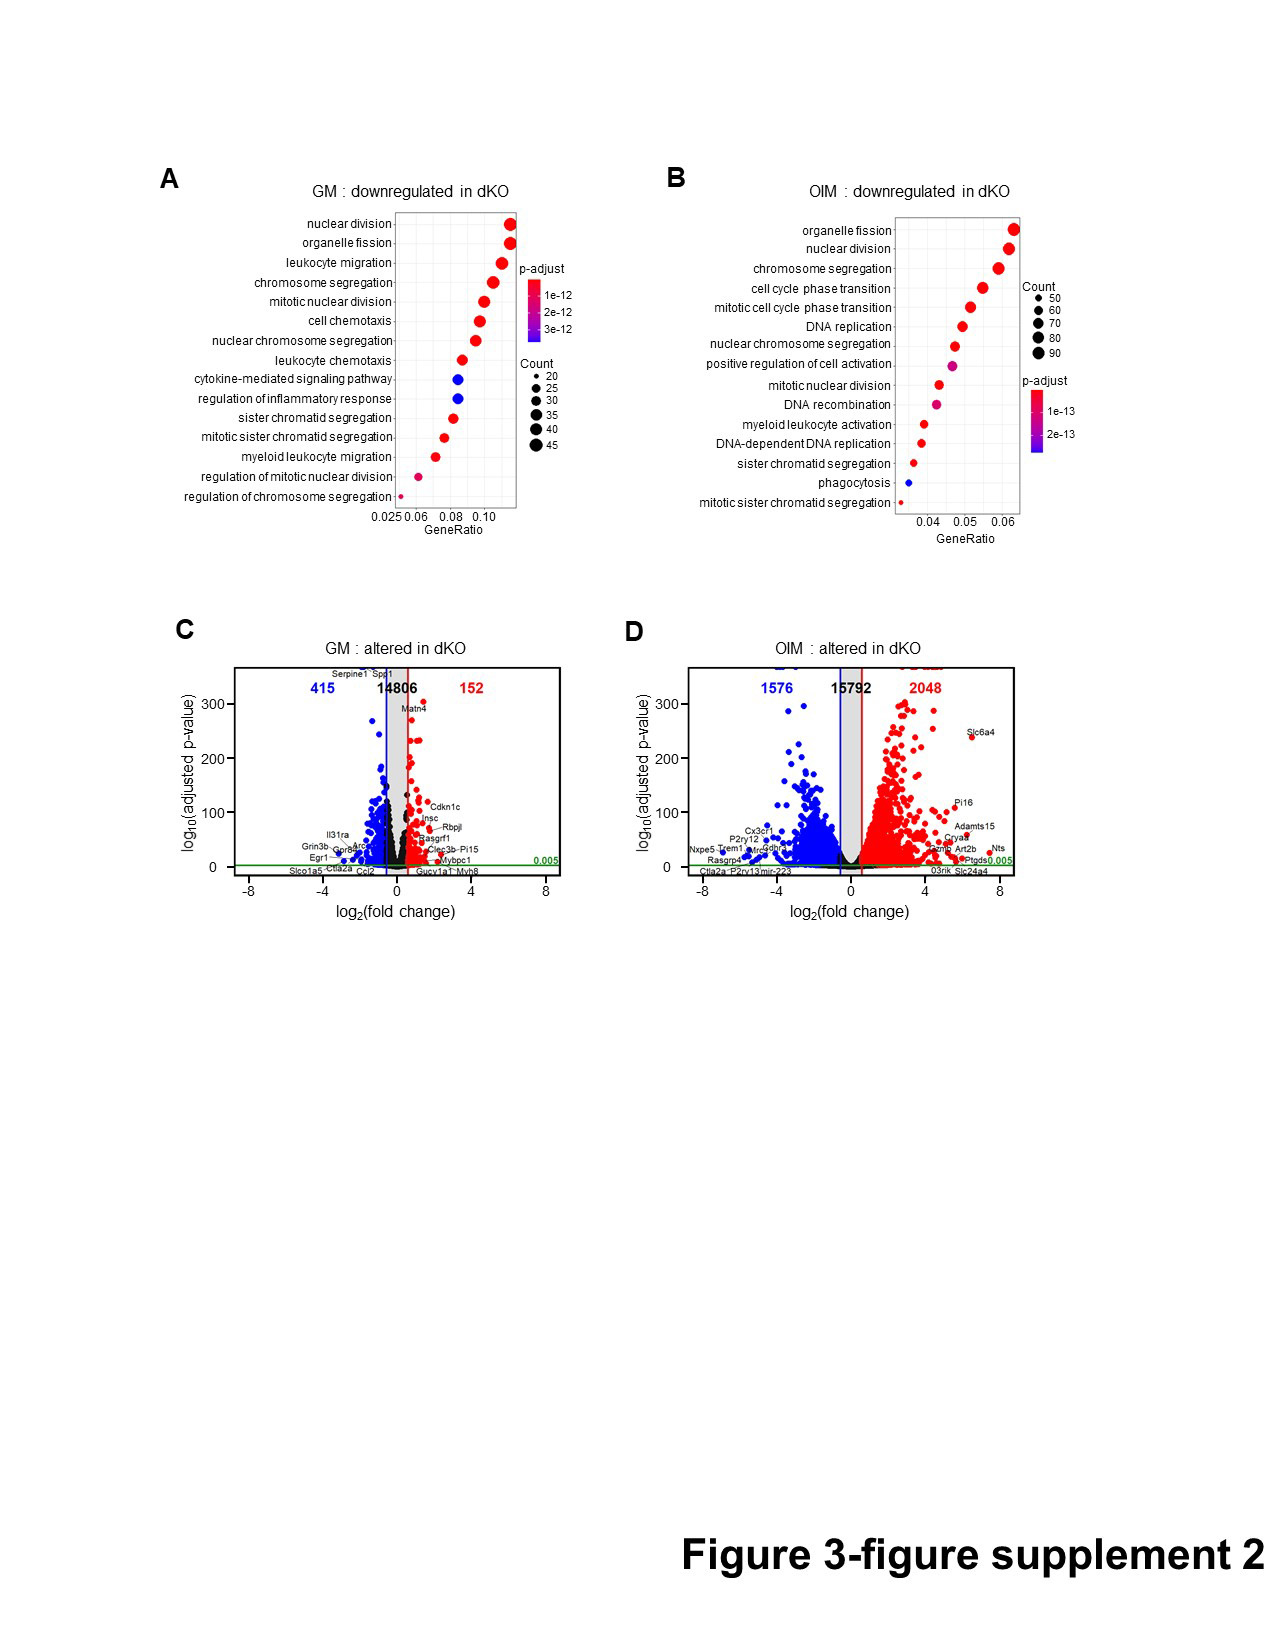

Supplement: supp [file elife-78069-supp-v1.zip › elife_poa_e78069_Figure_3_figure_supplement_2.jpg]

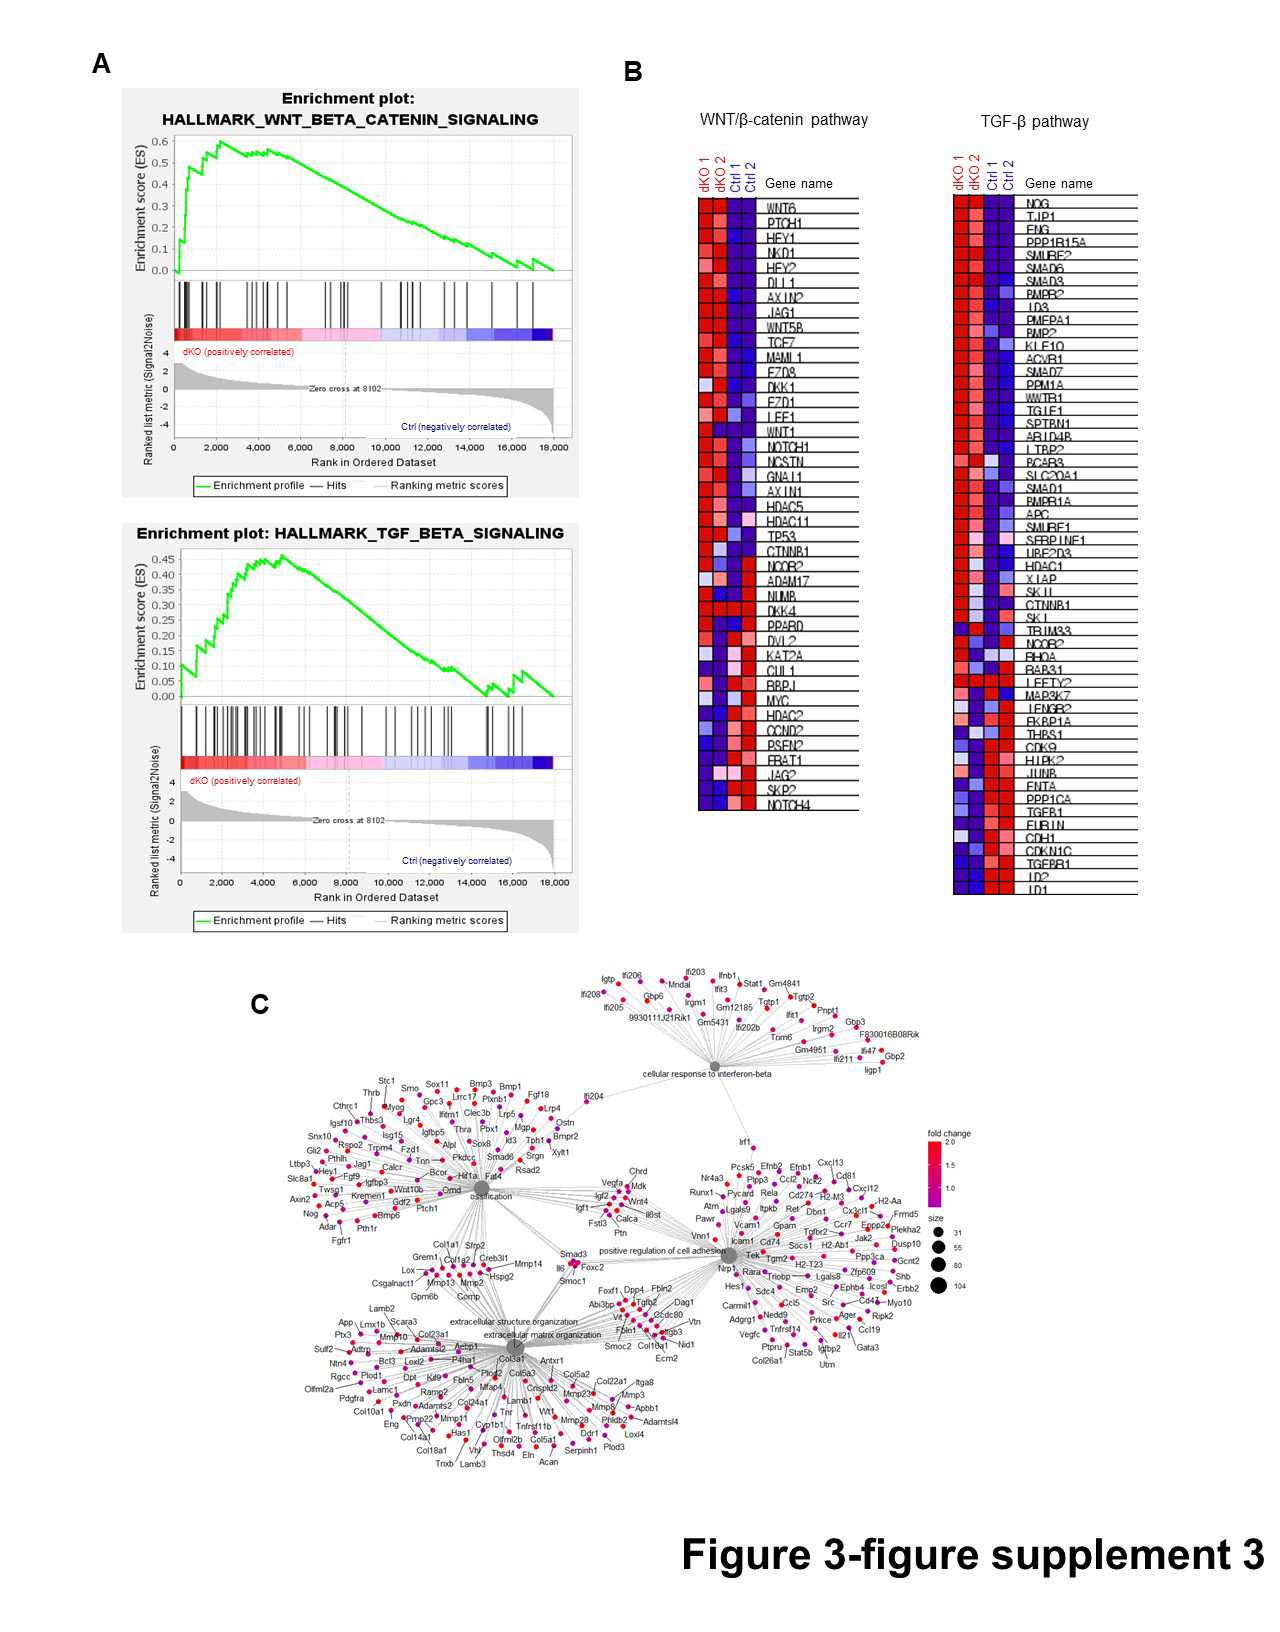

Supplement: supp [file elife-78069-supp-v1.zip › elife_poa_e78069_Figure_3_figure_supplement_3.jpg]

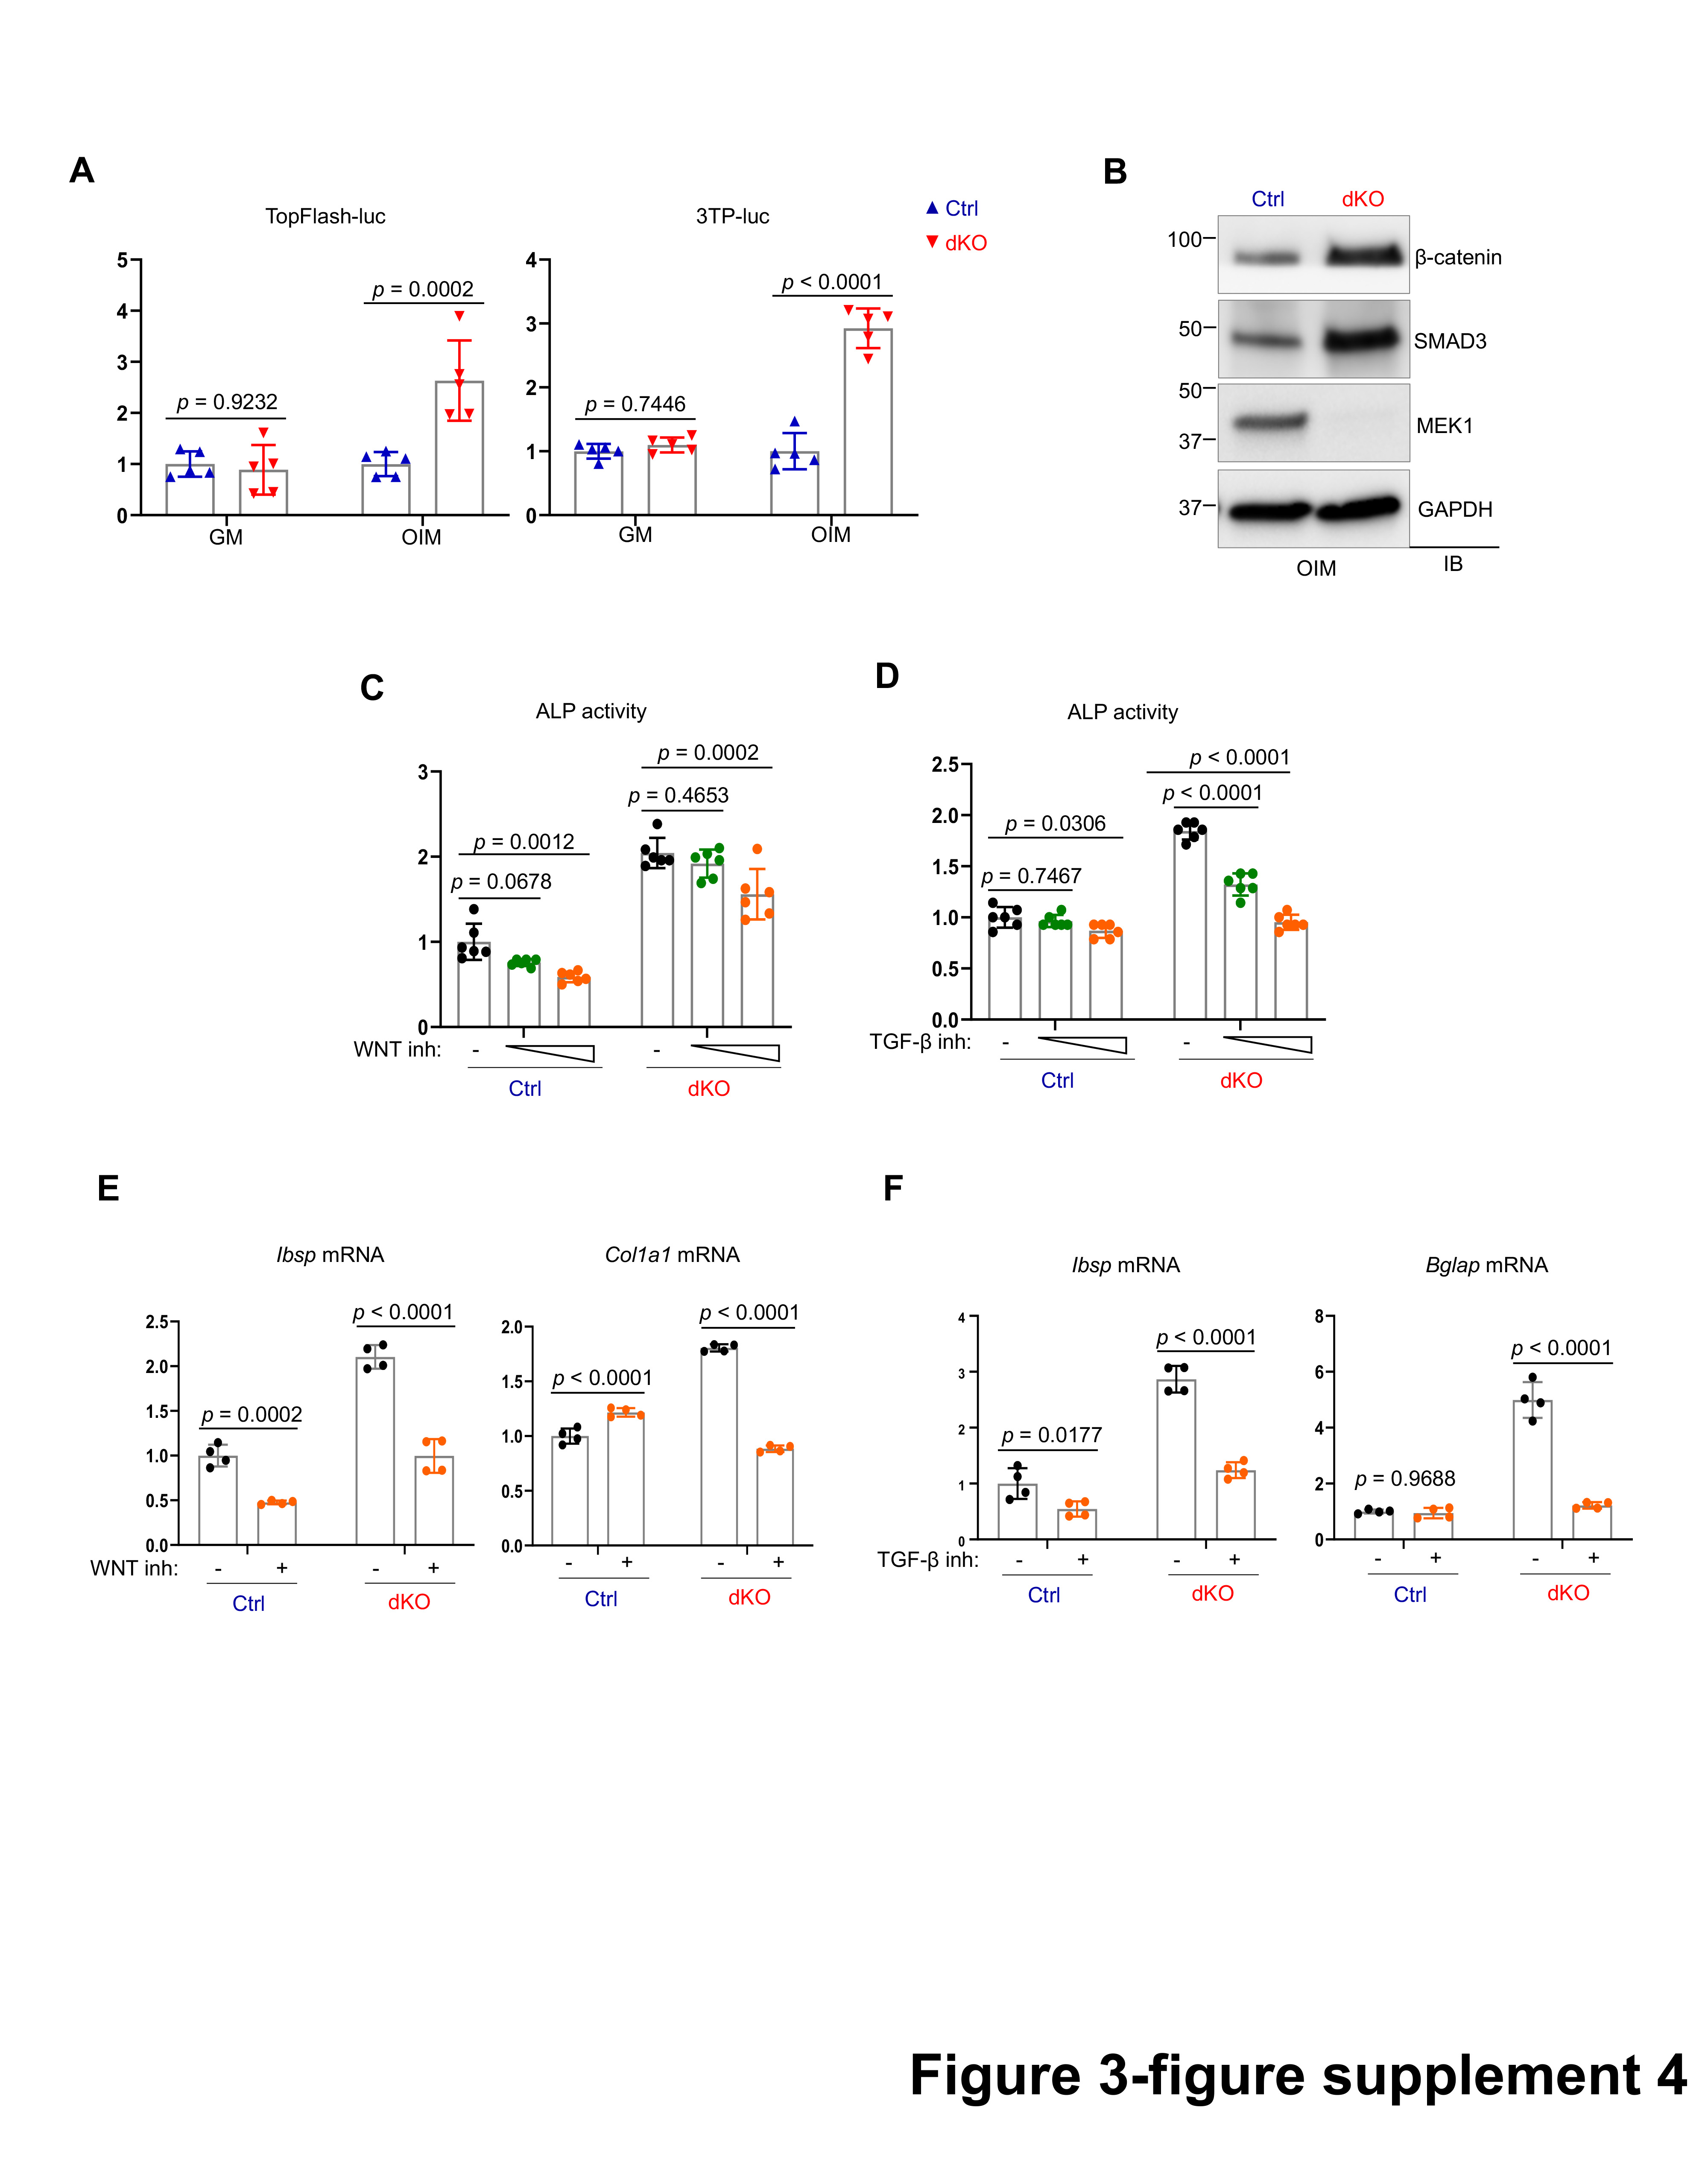

Supplement: supp [file elife-78069-supp-v1.zip › elife_poa_e78069_Figure_3_figure_supplement_4.jpg]

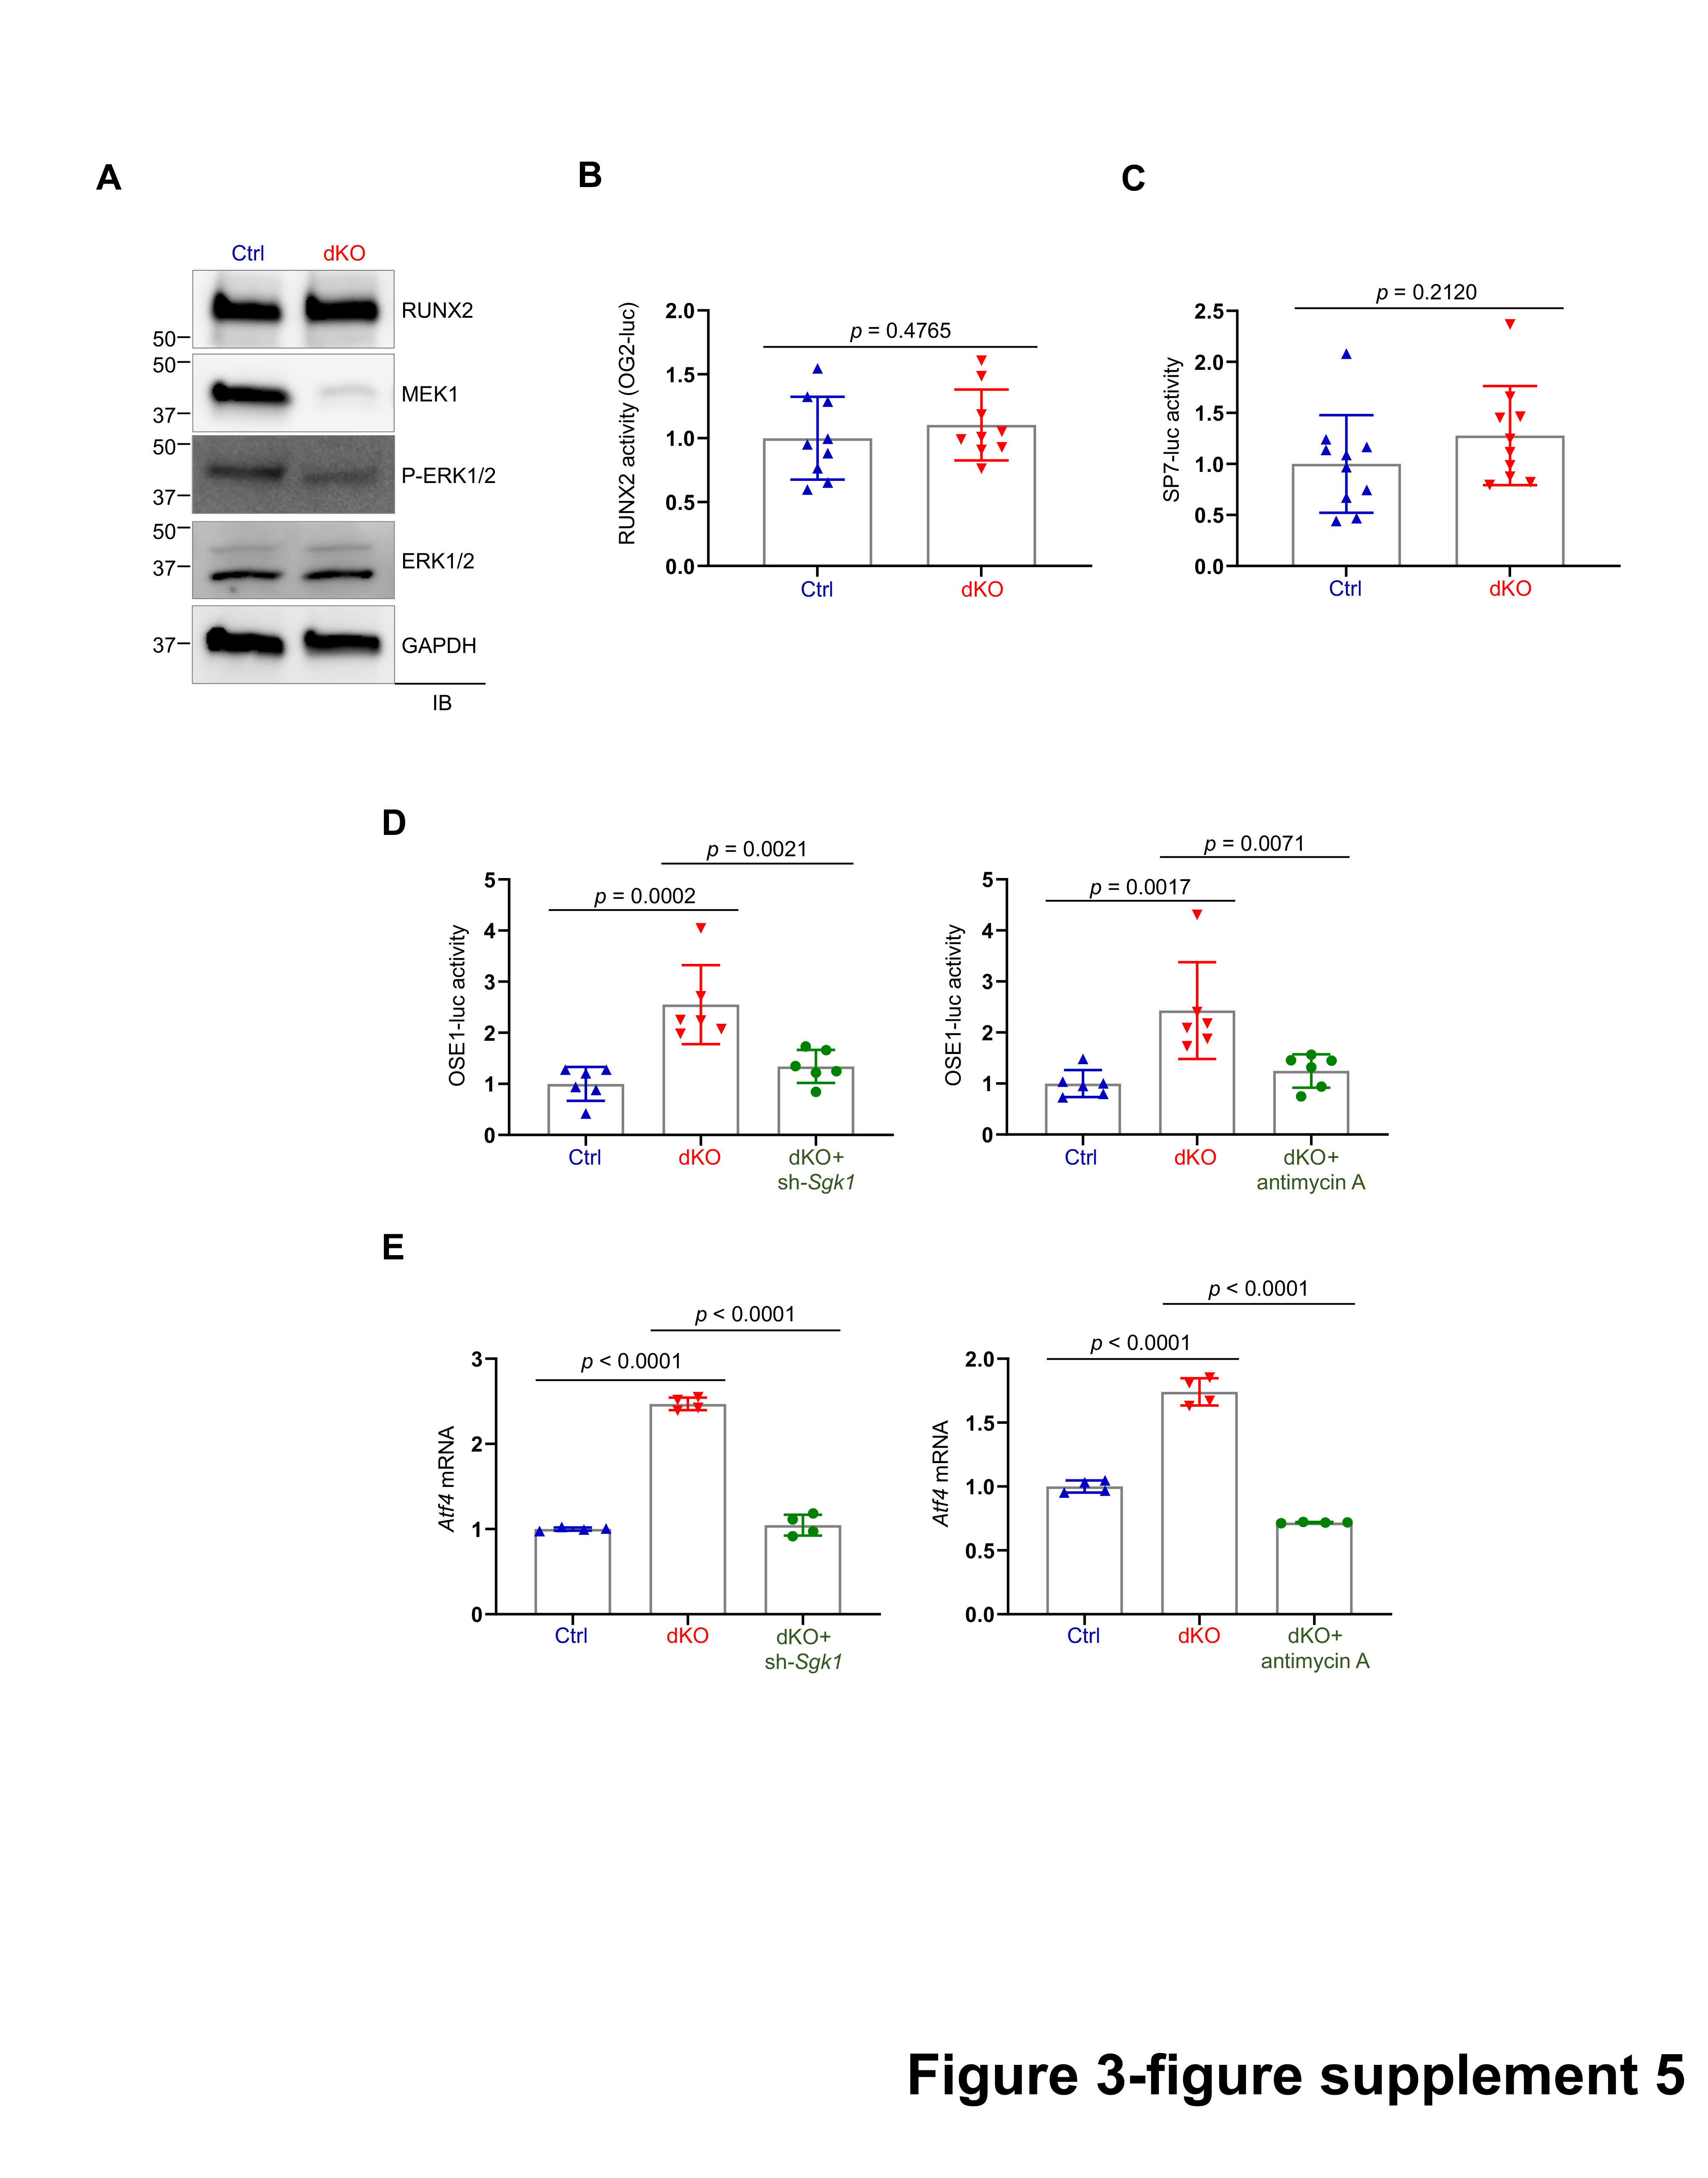

Supplement: supp [file elife-78069-supp-v1.zip › elife_poa_e78069_Figure_3_figure_supplement_5.jpg]

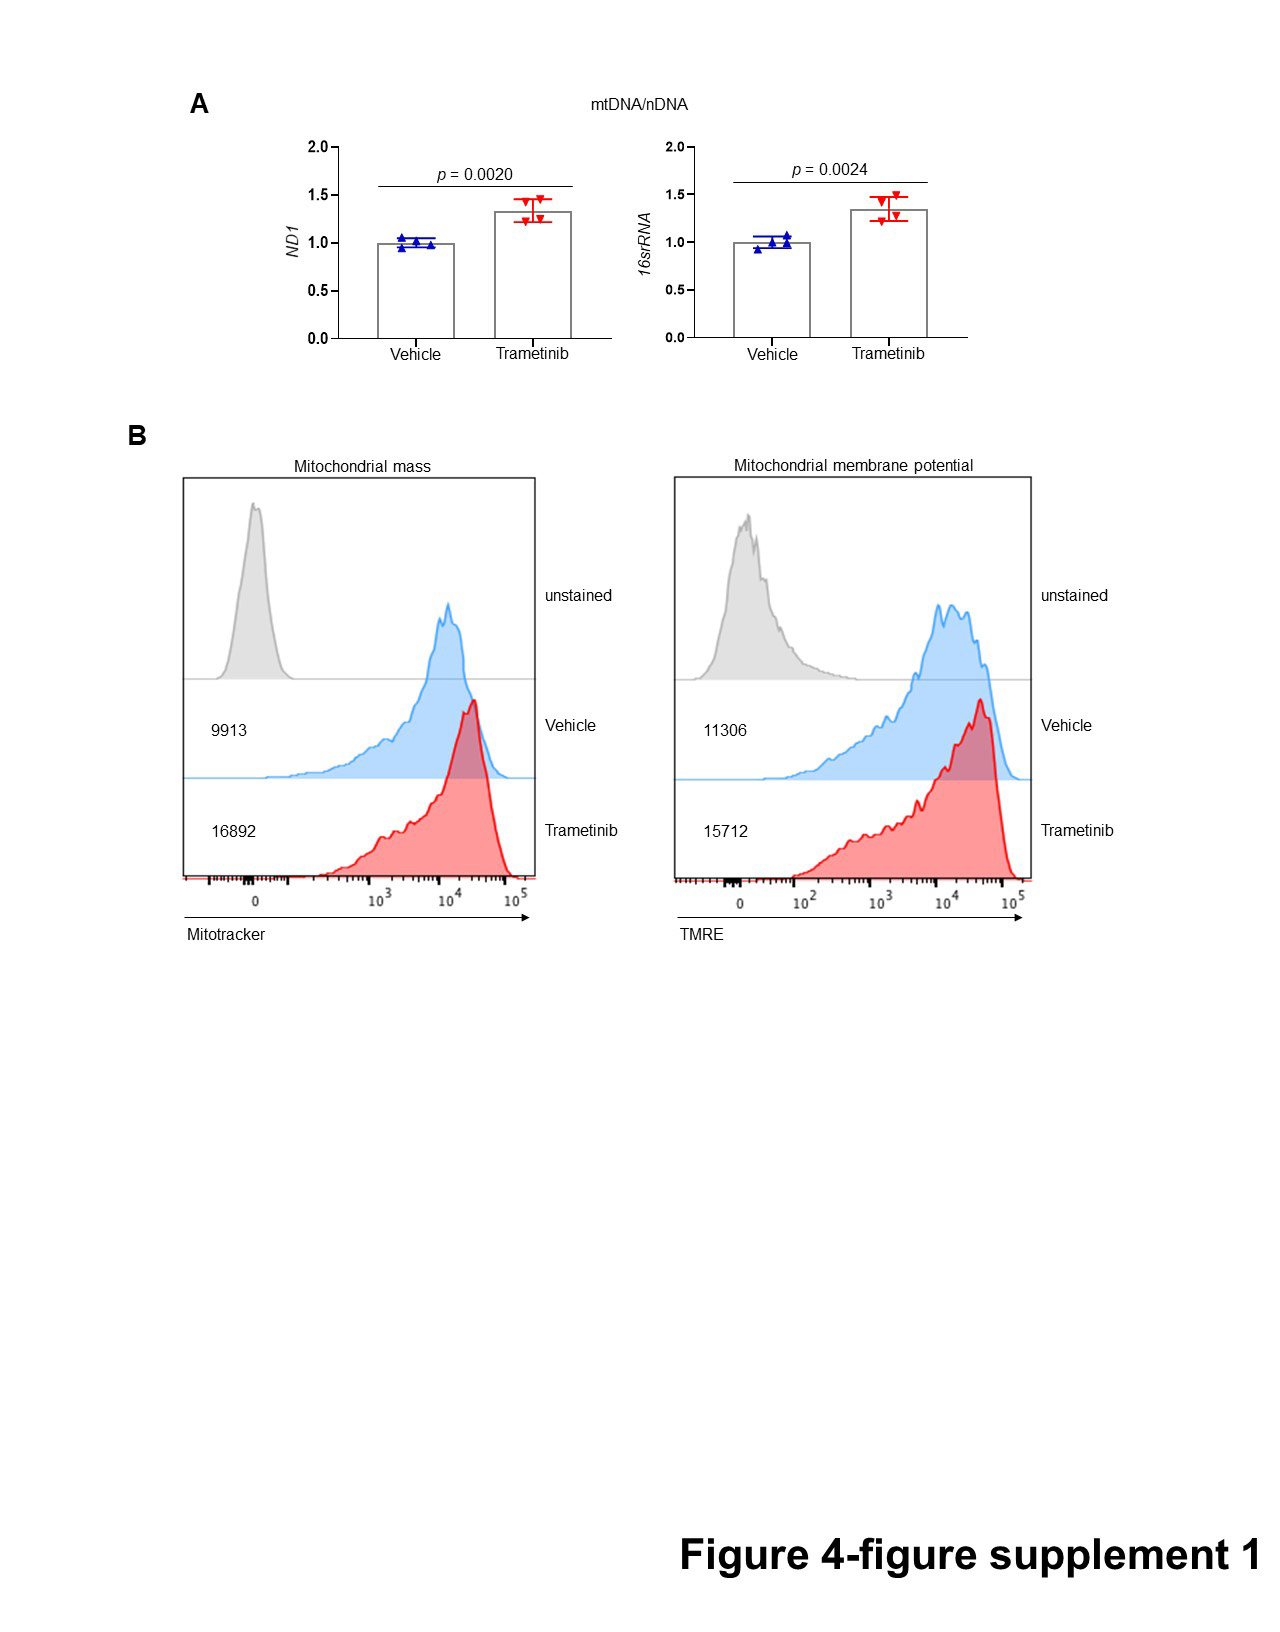

Supplement: supp [file elife-78069-supp-v1.zip › elife_poa_e78069_Figure_4_figure_supplement_1.jpg]

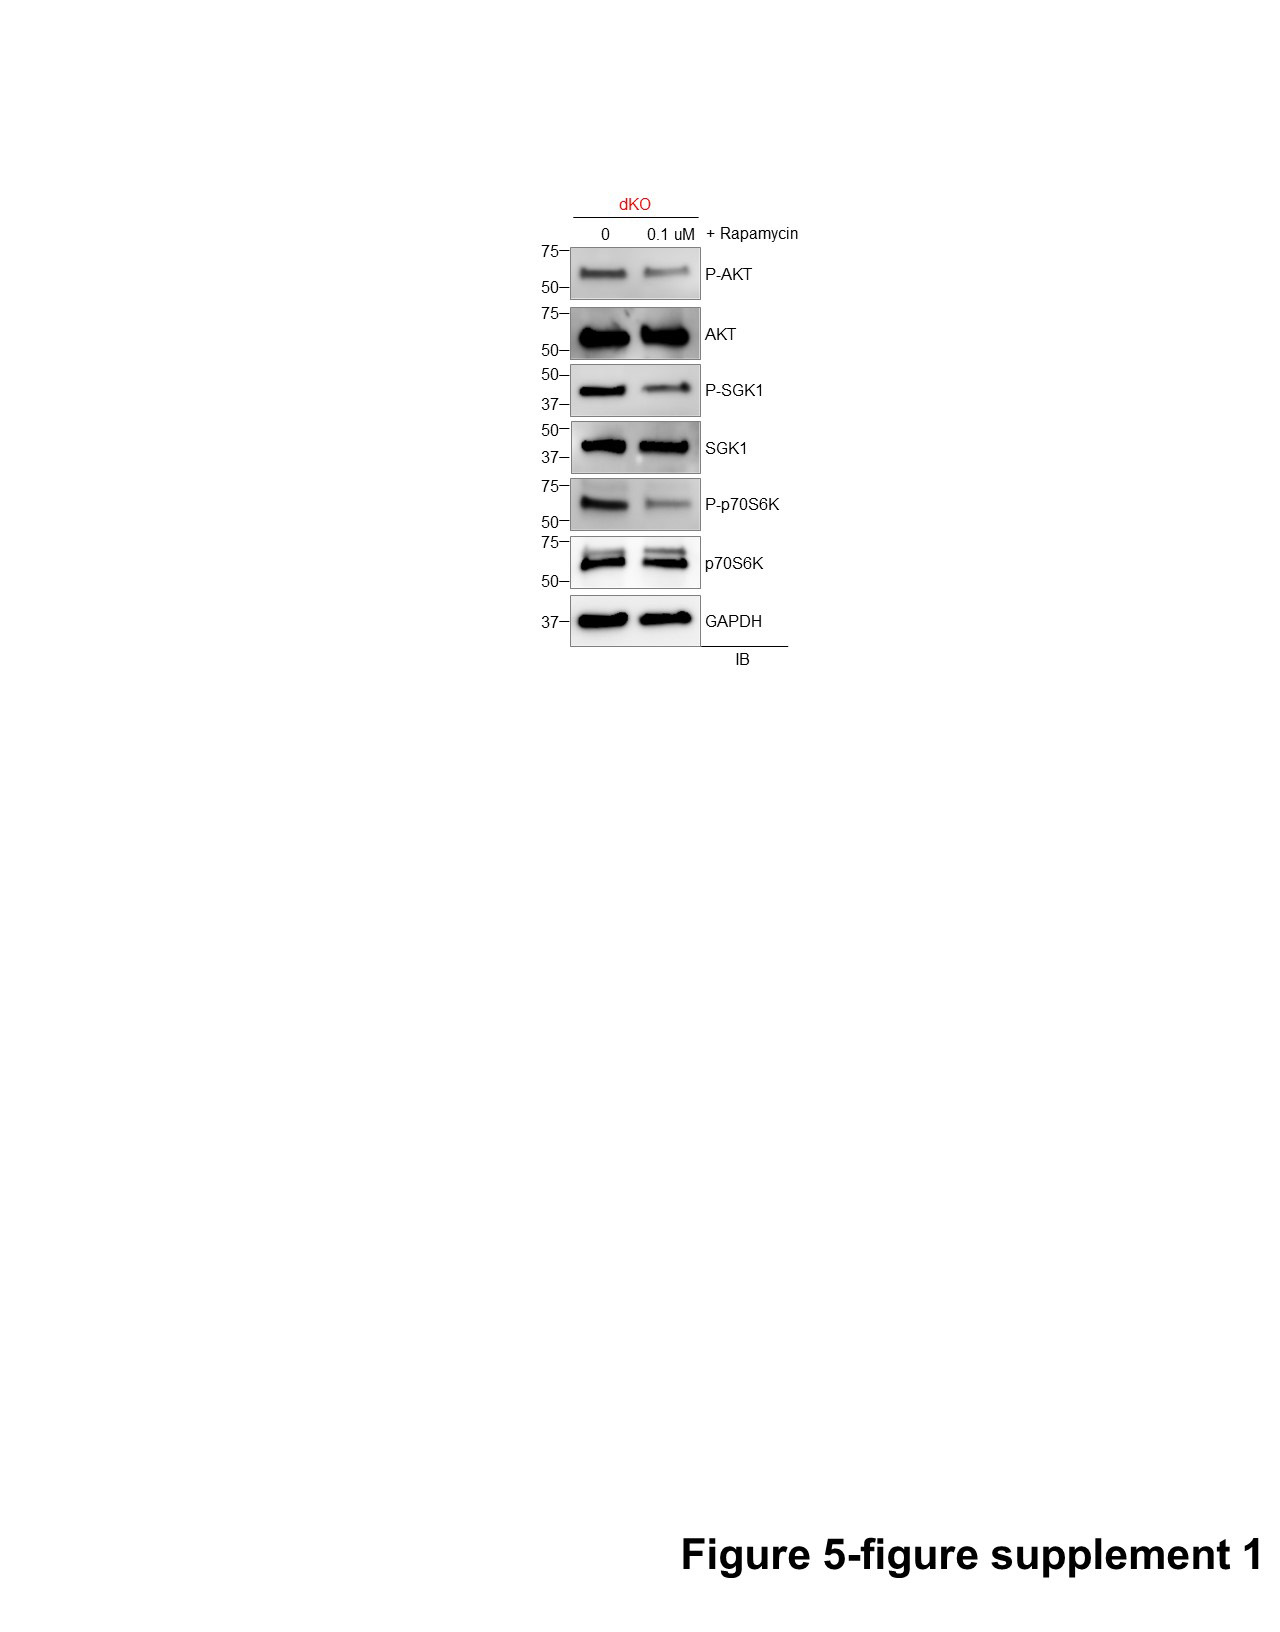

Supplement: supp [file elife-78069-supp-v1.zip › elife_poa_e78069_Figure_5_figure_supplement_1.jpg]
